# Supplementary material for: Ratiometric fluorescent Zn2+and In3+receptors of fused pyrazine with an aminopropanol chain in acetonitrile
Source: Royal Society of Chemistry journal article supplement (doi:10.1039/c3nj00750b), 2013-10-12
Supplement: c3nj00750b.pdf [file c3nj00750b.pdf]

Ratiometric fluorescent  $\text{Zn}^{2+}$  and  $\text{In}^{3+}$  receptor of fused pyrazine with an aminopropanol chain  
in acetonitrile

NJ-ART.-07-2013-000750

Katarzyna Ostrowska,\* Alicja Kaźmierska, Maria Rapała-Kozik, Justyna Kalinowska-Tłuścik  
New Journal of Chemistry

Supplementary Information  
**2D fluorescence spectra:**

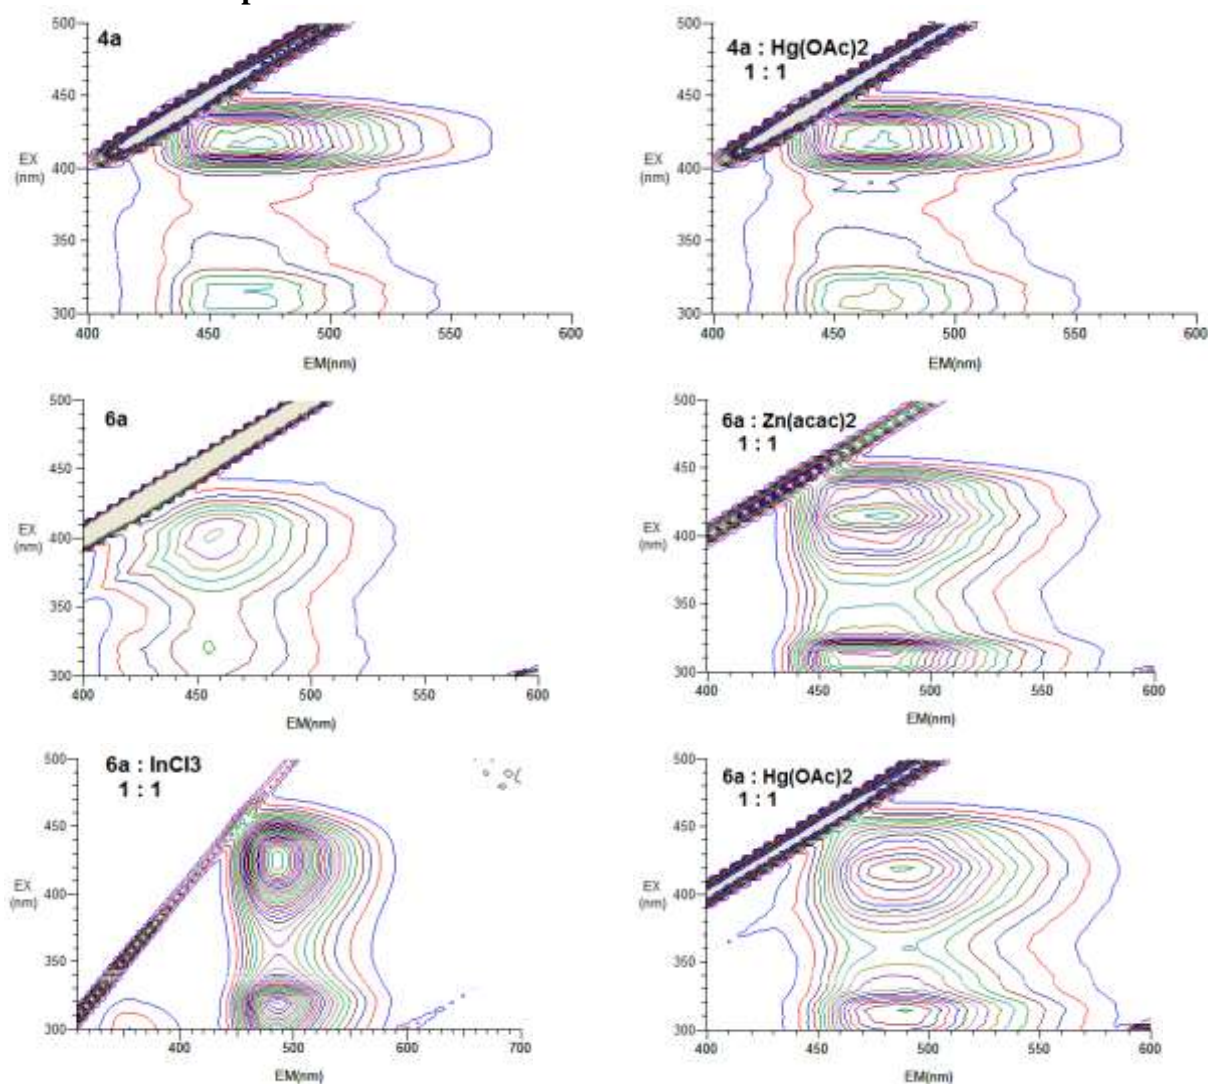

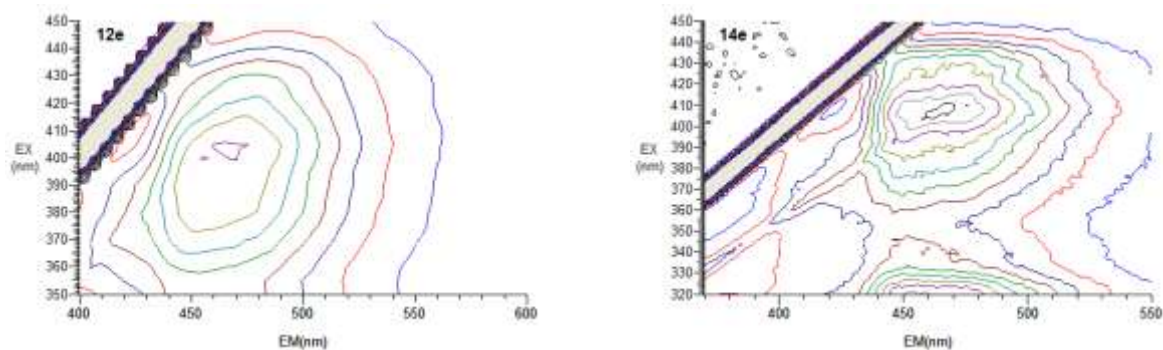

fluorescence spectra of **4a**, **6a**, **10a**, **12e**, and **14e** (10  $\mu$ M) in  $\text{CH}_3\text{CN}$  with 1 equiv. of  $\text{Cd}^{2+}$  ( $\lambda_{\text{ex}} = 420$  nm, voltage 450 V).

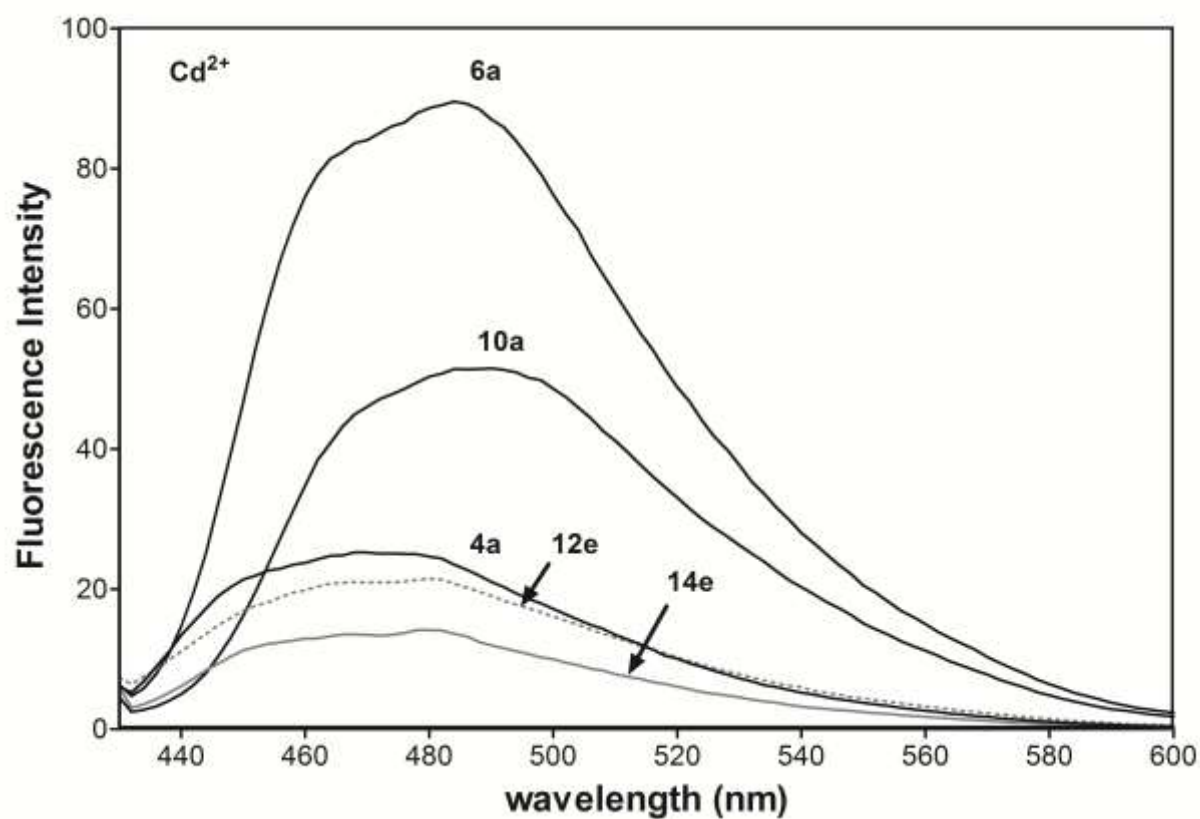

Fluorescence spectra of **4a**, **6a**, **10a**, **12e**, and **14e** (10  $\mu$ M) in  $\text{CH}_3\text{CN}$  with 1 equiv. of  $\text{Hg}^{2+}$  ( $\lambda_{\text{ex}} = 415$  nm, voltage 400 V).

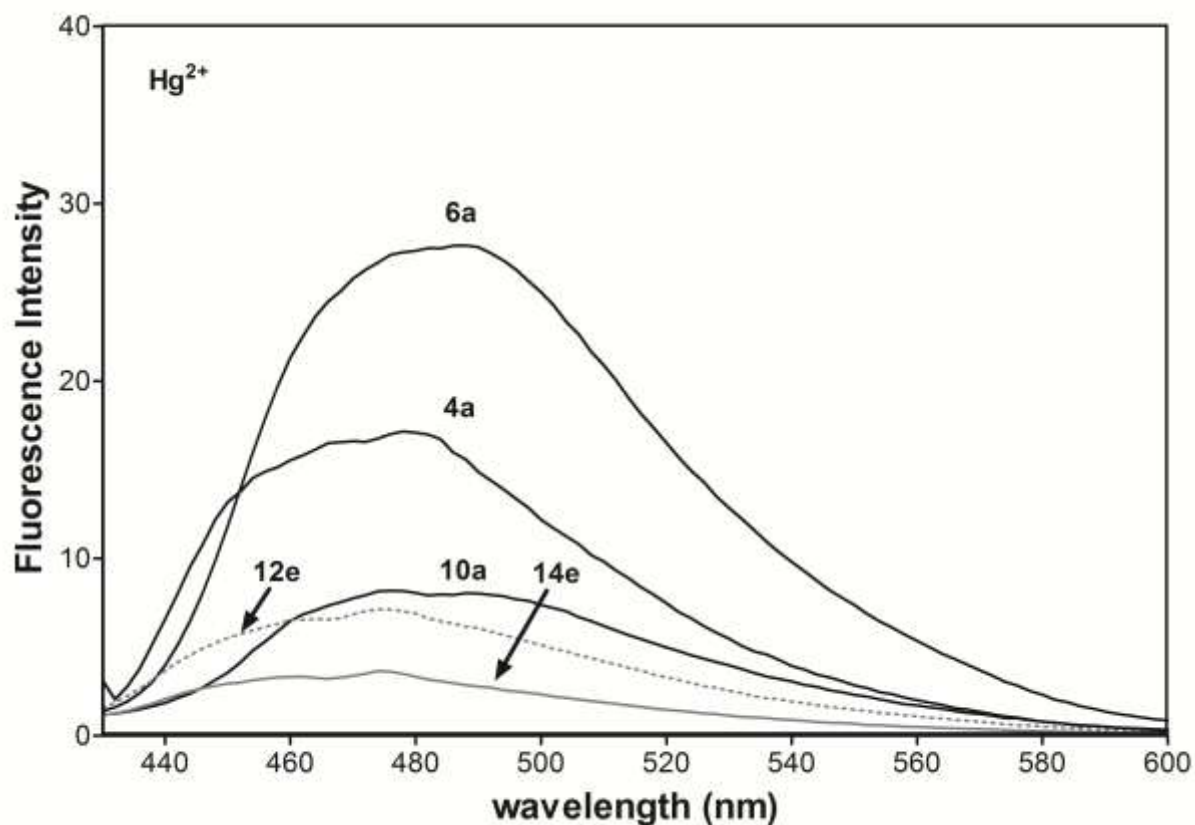

fluorescence titration ( $\lambda_{\text{ex}} = 415 \text{ nm}$ , 450 V) of **6a** (10  $\mu\text{M}$ ) in  $\text{CH}_3\text{CN}$  with  $\text{Zn}(\text{OAc})_2$ . The concentration of  $\text{Zn}^{2+}$  was increased from 0 to 40  $\mu\text{M}$ . Inset: increase in fluorescent intensity at  $\lambda_{\text{em}} = 482 \text{ nm}$  as the function of  $\text{Zn}^{2+}$  concentration.

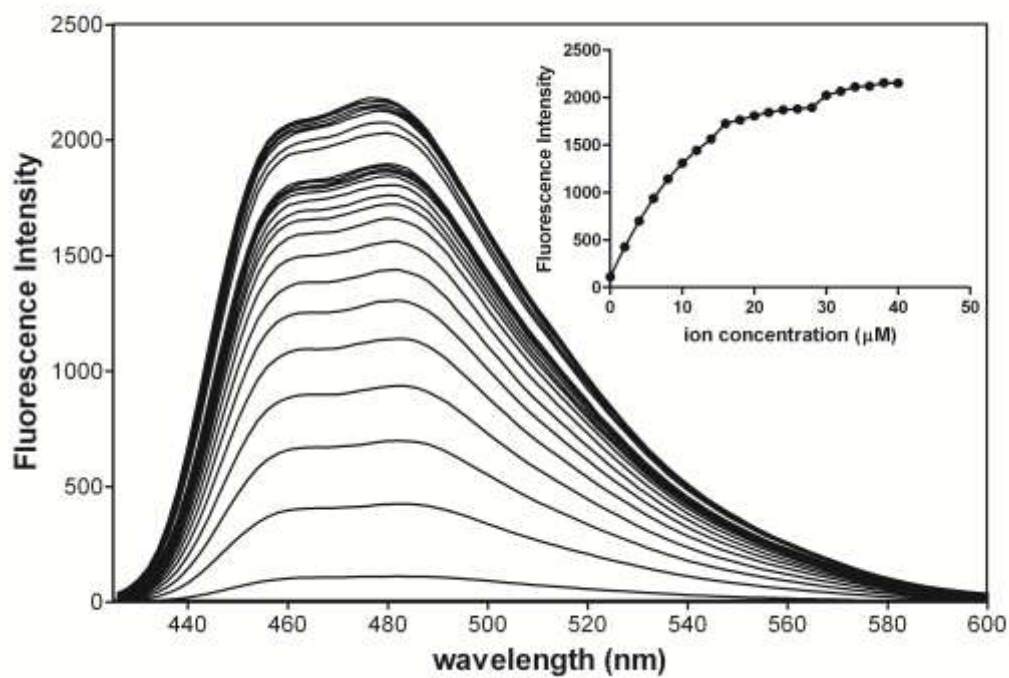

Fluorescence titration ( $\lambda_{\text{ex}} = 415 \text{ nm}$ , 550 V) of **6a** (10  $\mu\text{M}$ ) in  $\text{CH}_3\text{CN}$  with  $\text{ZnCl}_2$ . The concentration of  $\text{Zn}^{2+}$  was increased from 0 to 30  $\mu\text{M}$ . Inset: increase in fluorescent intensity at  $\lambda_{\text{em}} = 464 \text{ nm}$  as the function of  $\text{Zn}^{2+}$  concentration.

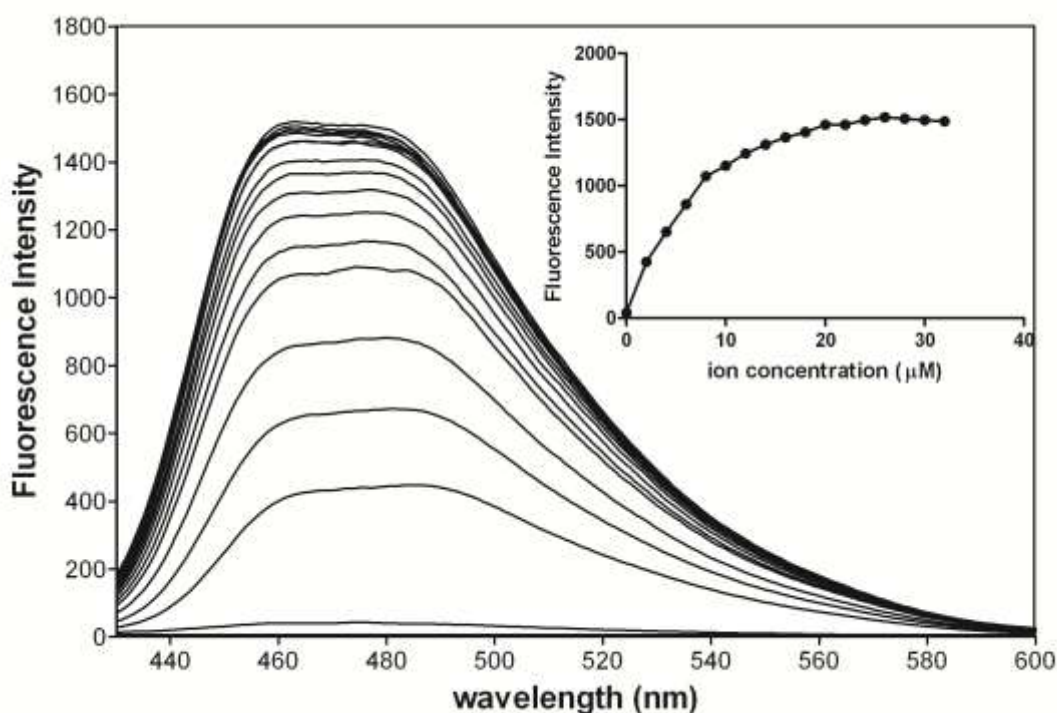

Fluorescence titration ( $\lambda_{\text{ex}} = 415 \text{ nm}$ , 400 V) of **6a** (10  $\mu\text{M}$ ) in  $\text{CH}_3\text{CN}$  with  $\text{Zn}(\text{acac})_2$ . The concentration of  $\text{Zn}^{2+}$  was increased from 0 to 30  $\mu\text{M}$ . Inset: increase in fluorescent intensity at  $\lambda_{\text{em}} = 482 \text{ nm}$  as the function of  $\text{Zn}^{2+}$  concentration.

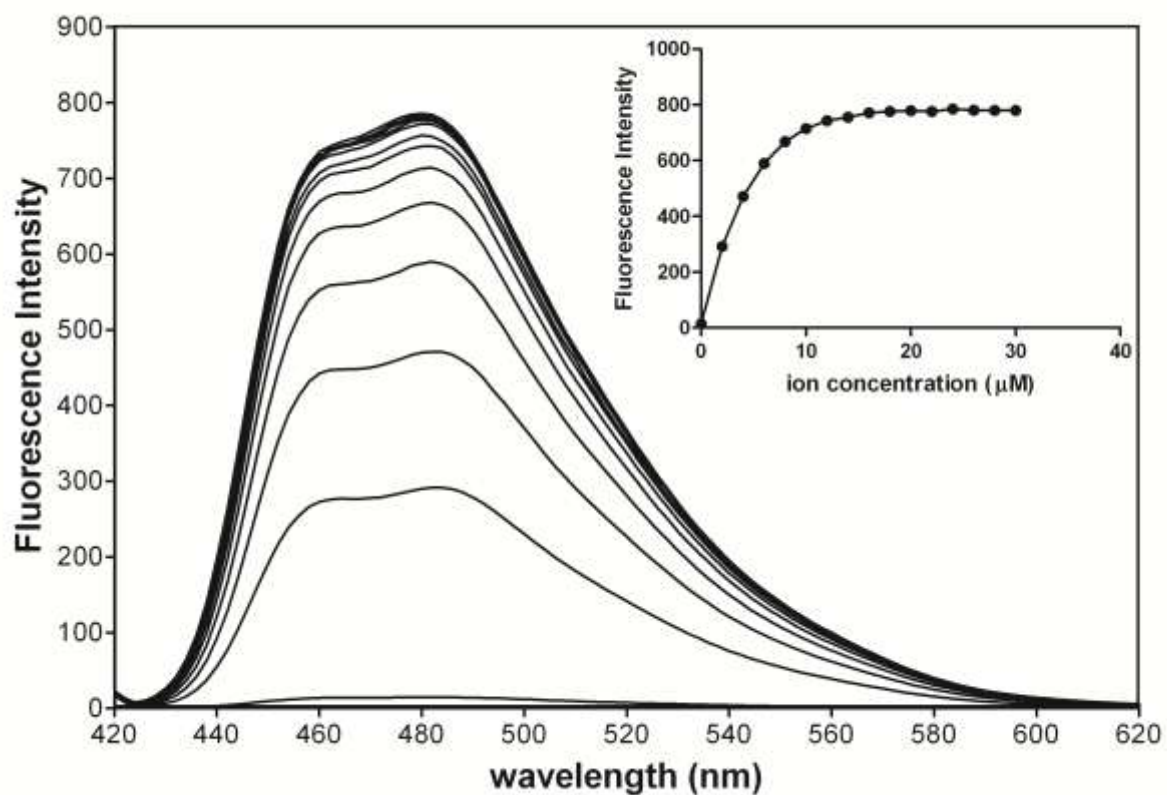

### MR spectra

Partial  $^1\text{H}$  NMR spectra **6a** (600.206 MHz,  $\text{CD}_3\text{CN}$ ) with 0.0 equiv.  $\text{Zn}(\text{acac})_2$ ; 0.2 equiv.  $\text{Zn}(\text{acac})_2$ ; 0.6 equiv.  $\text{Zn}(\text{acac})_2$ ; 1.0 equiv.  $\text{Zn}(\text{acac})_2$ ; 1.4 equiv.  $\text{Zn}(\text{acac})_2$



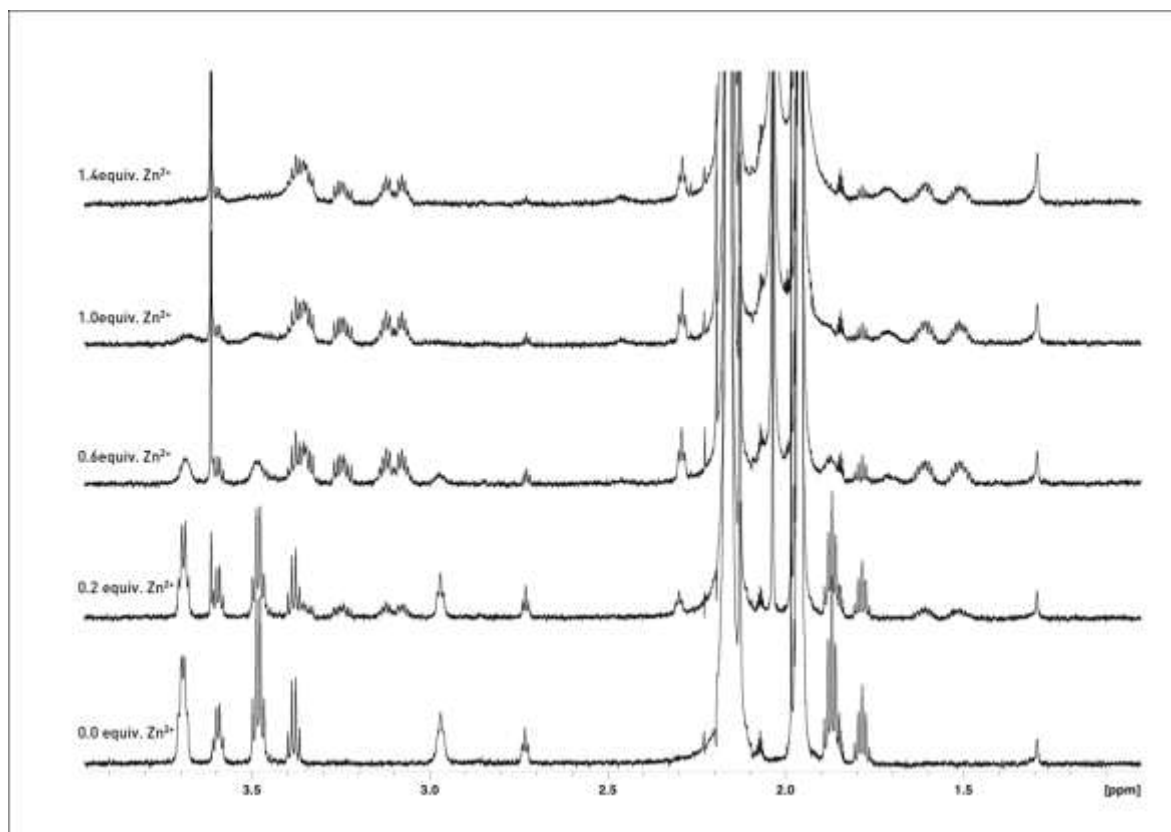

**6a** (300.13 MHz,  $\text{DMSO-}d_6$ ): 0.5 equiv.  $\text{Zn}(\text{acac})_2$ ; 1.0 equiv.  $\text{Zn}(\text{acac})_2$ ; 1.5 equiv.  $\text{Zn}(\text{acac})_2$ ; 2.0 equiv.  $\text{Zn}(\text{acac})_2$

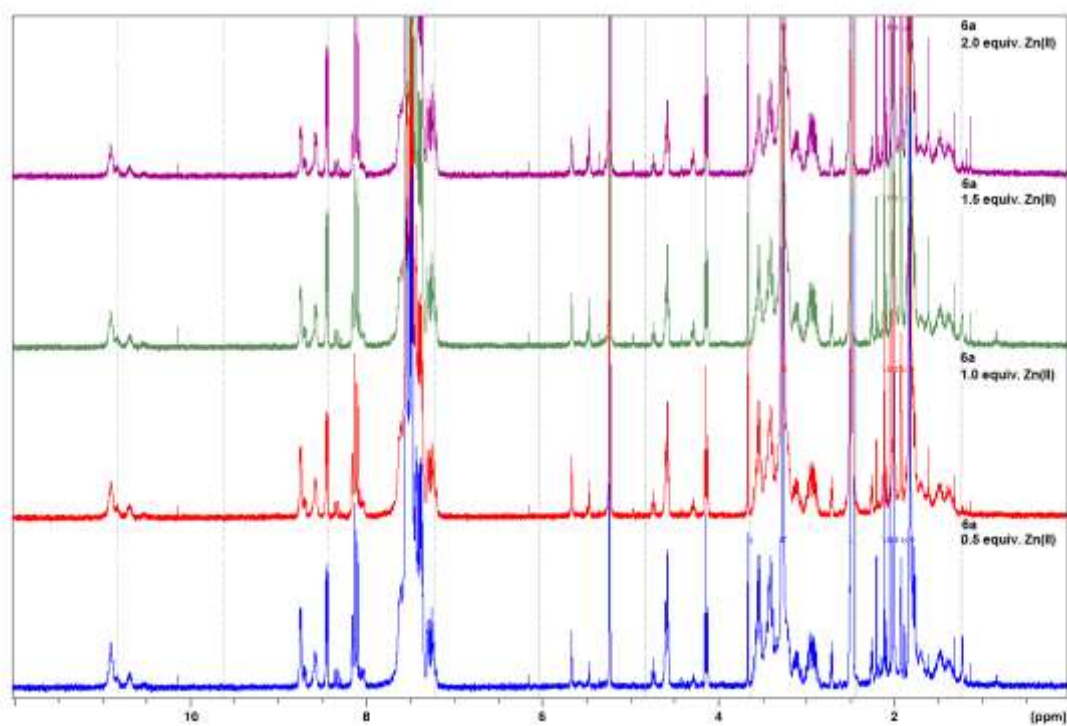

# H-6a-DMSO-d<sub>6</sub> with Zn(acac)<sub>2</sub>

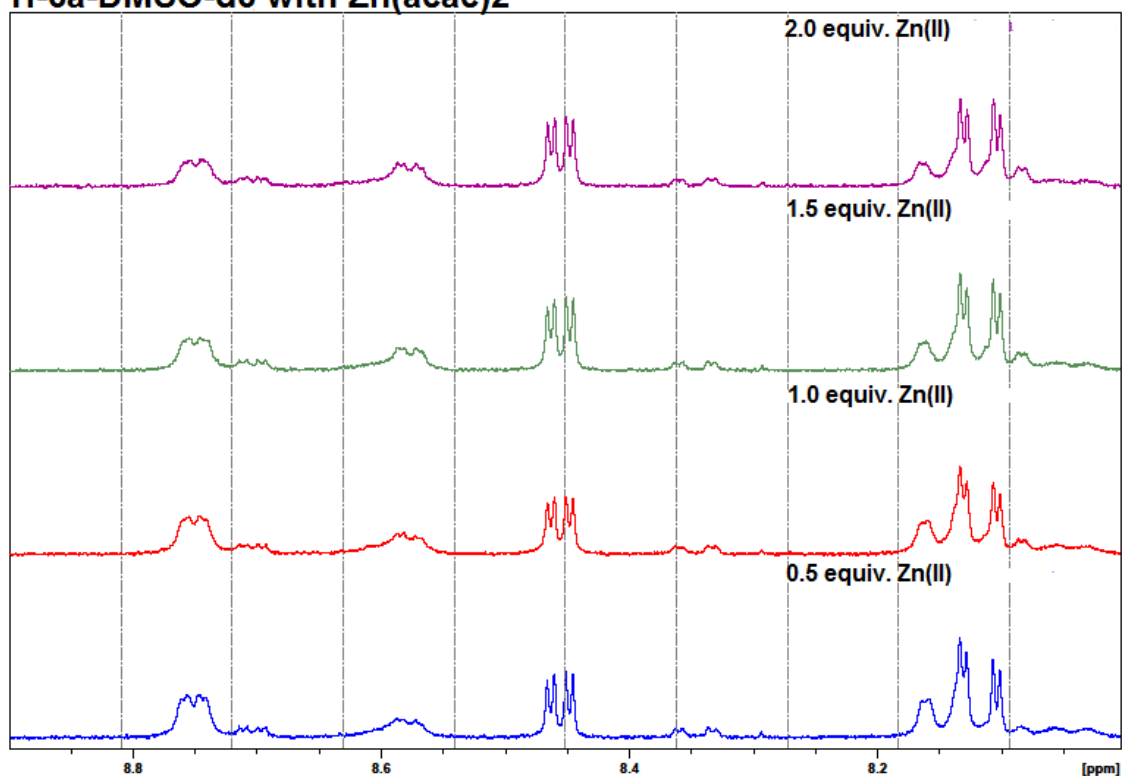

## 6a (300.13 MHz, CDCl<sub>3</sub>)

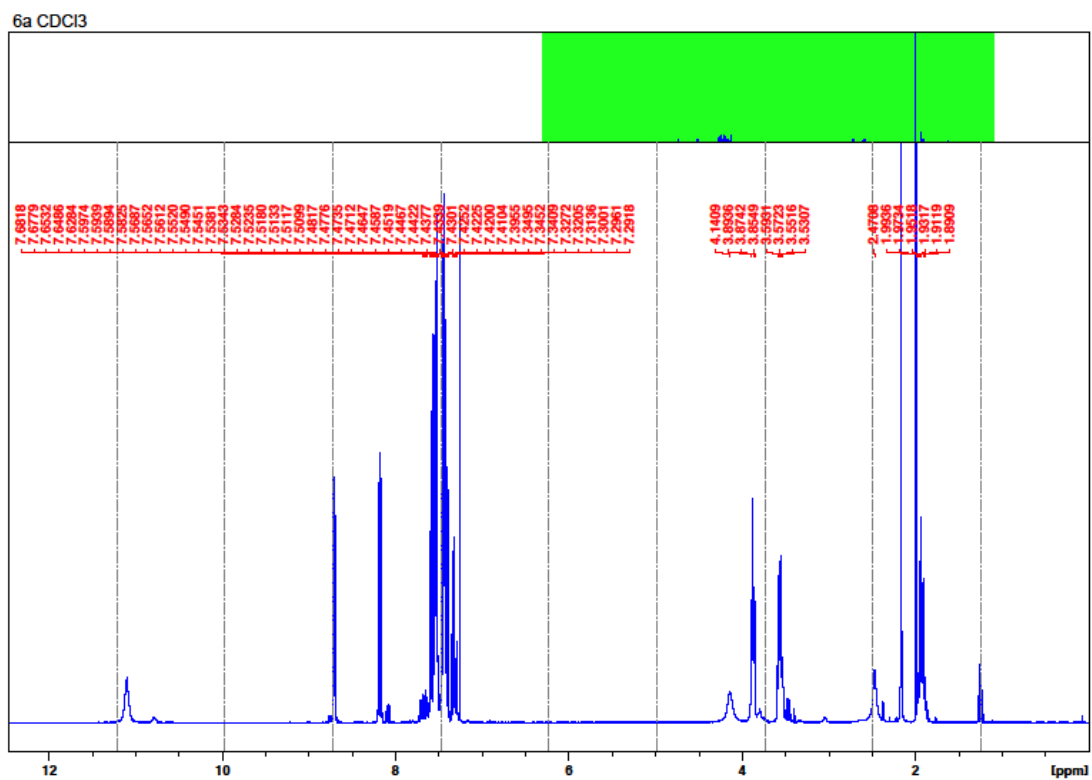

6a CDCl<sub>3</sub> - aliphatic region

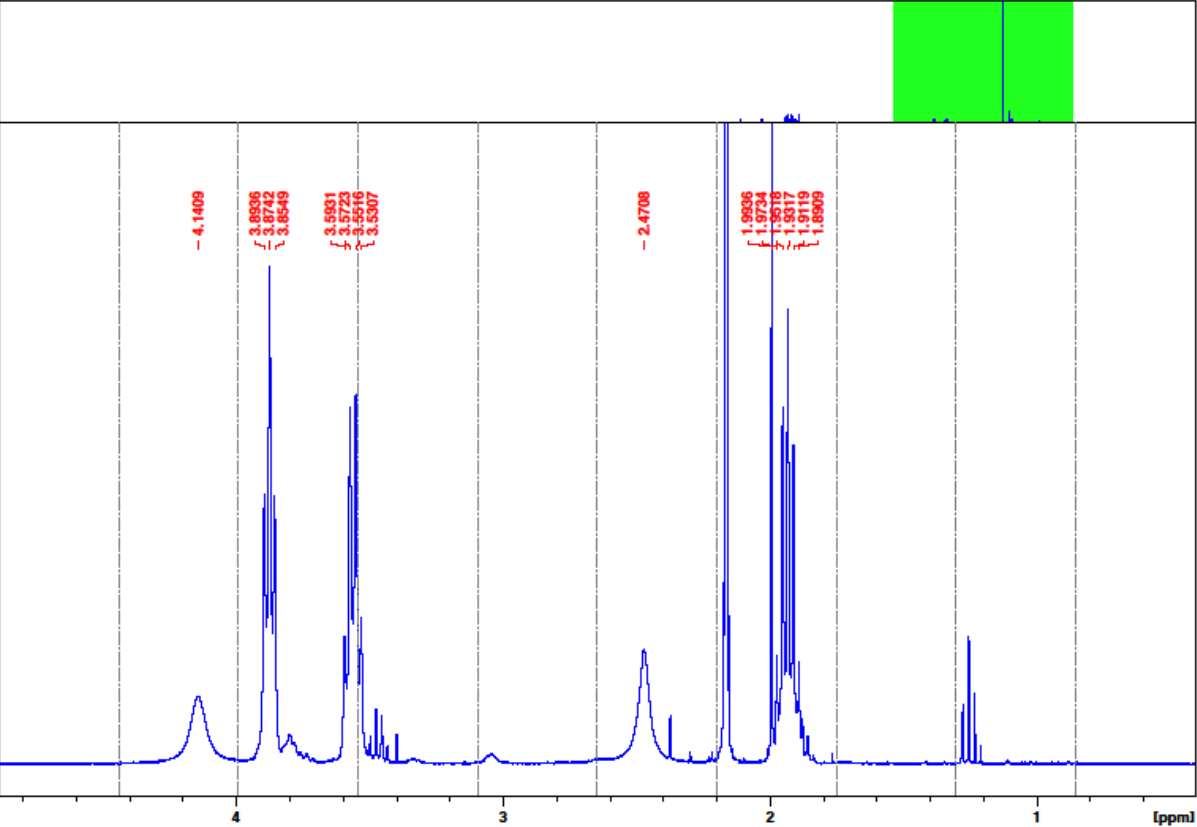

6a CDCl<sub>3</sub> - aromatic region

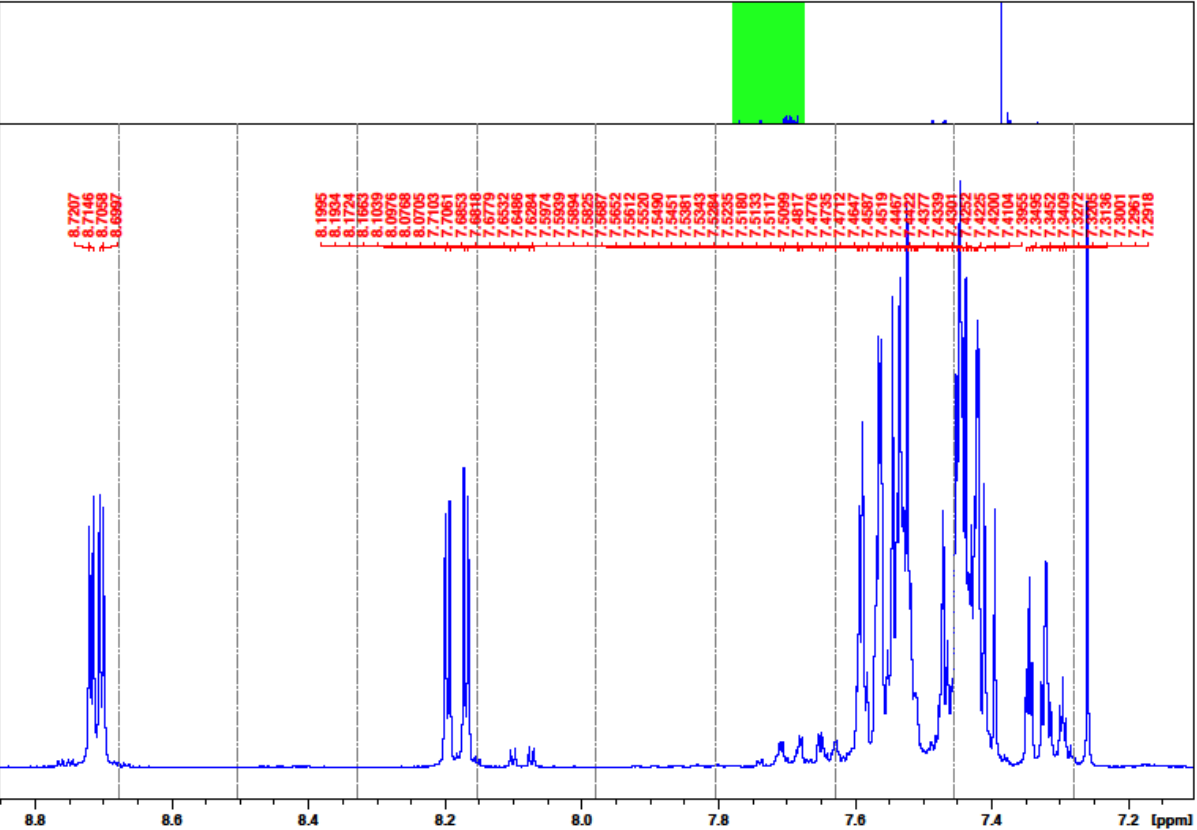



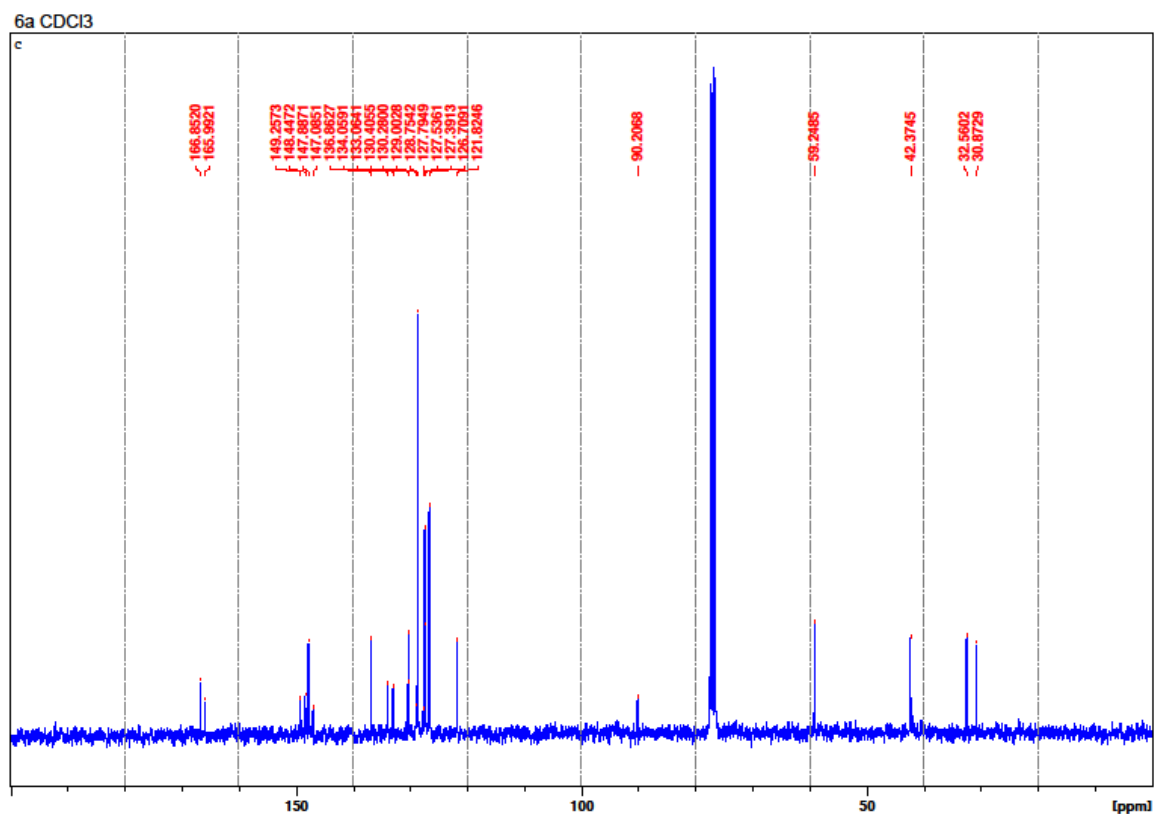

6a (300.13 MHz, )

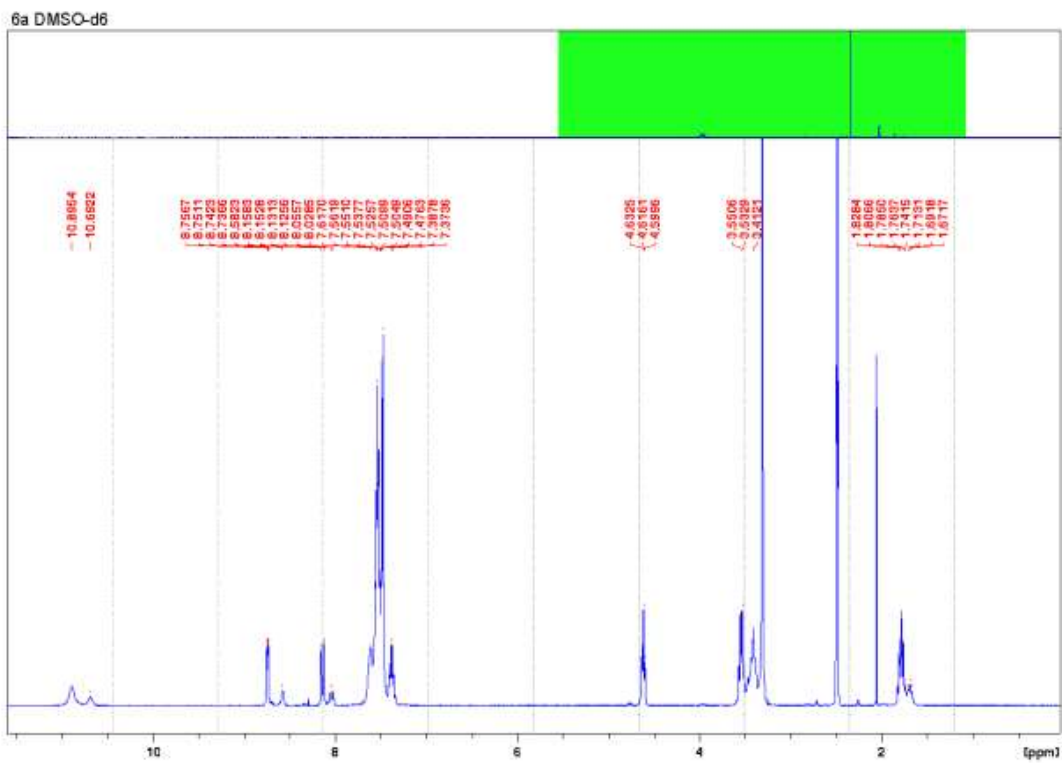

6b - CDCl<sub>3</sub>

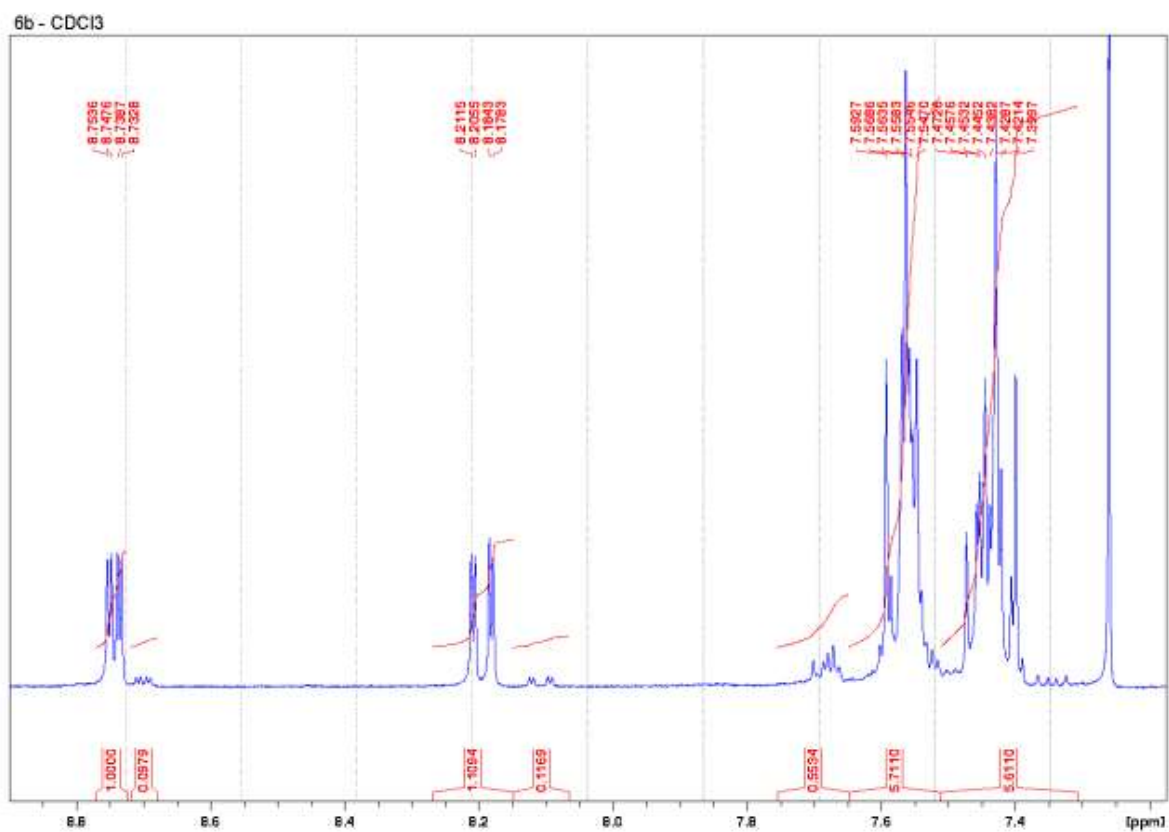

**6b** (75.47 MHz, CDCl<sub>3</sub>)

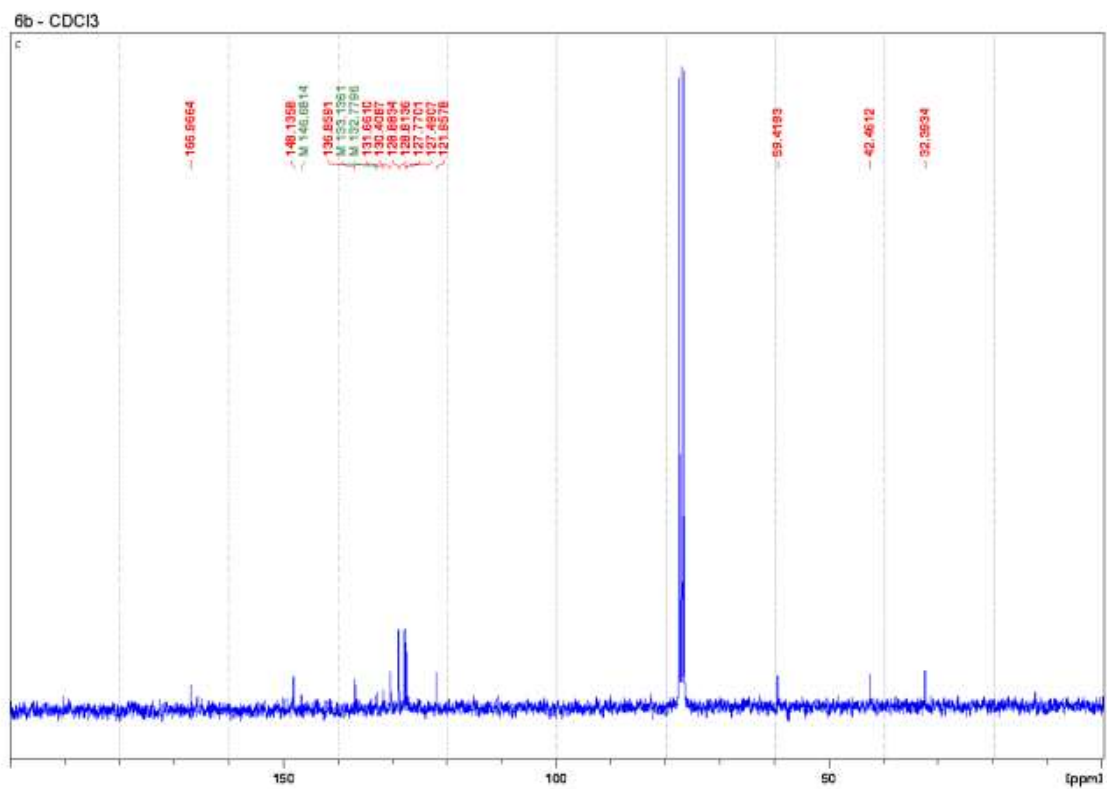



**6c** (75.47 MHz, CDCl<sub>3</sub>)

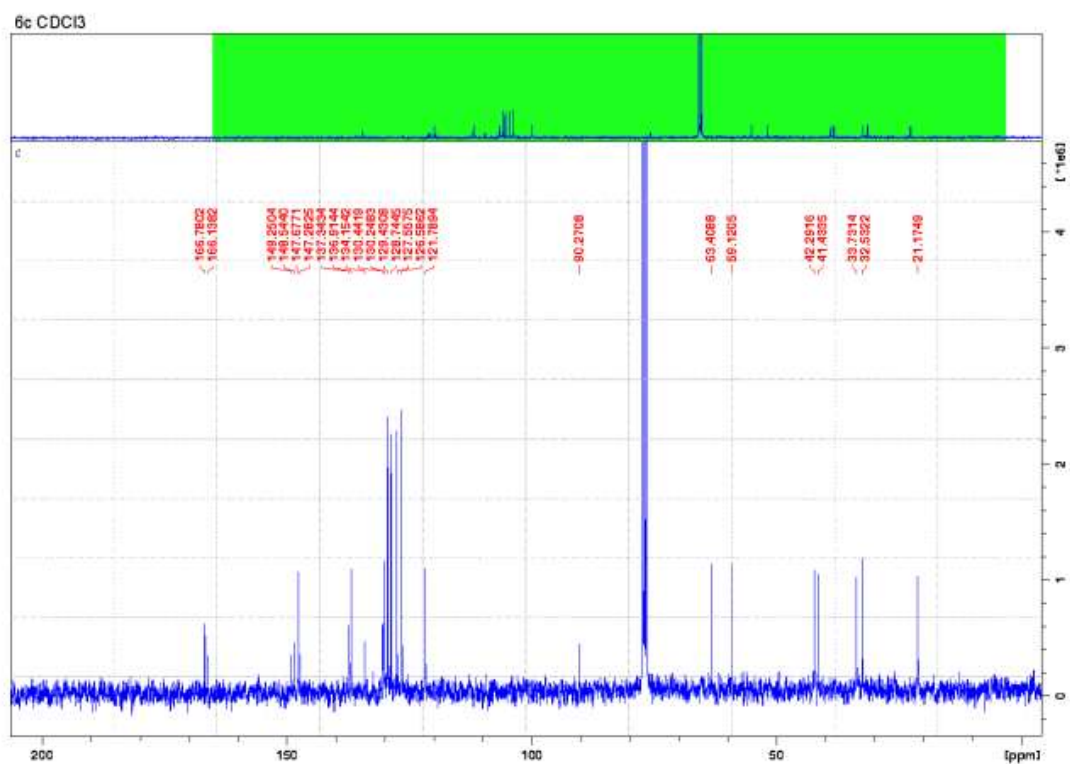

**6d** (300.13 MHz, CDCl<sub>3</sub>)

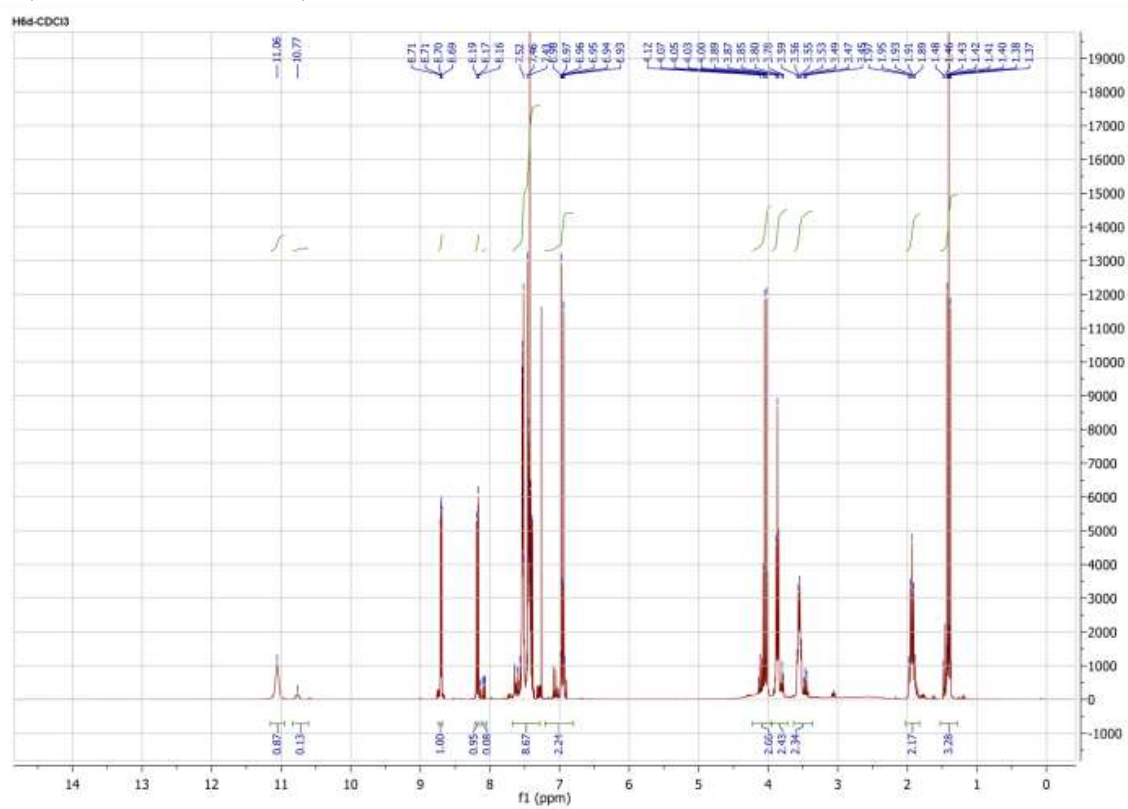

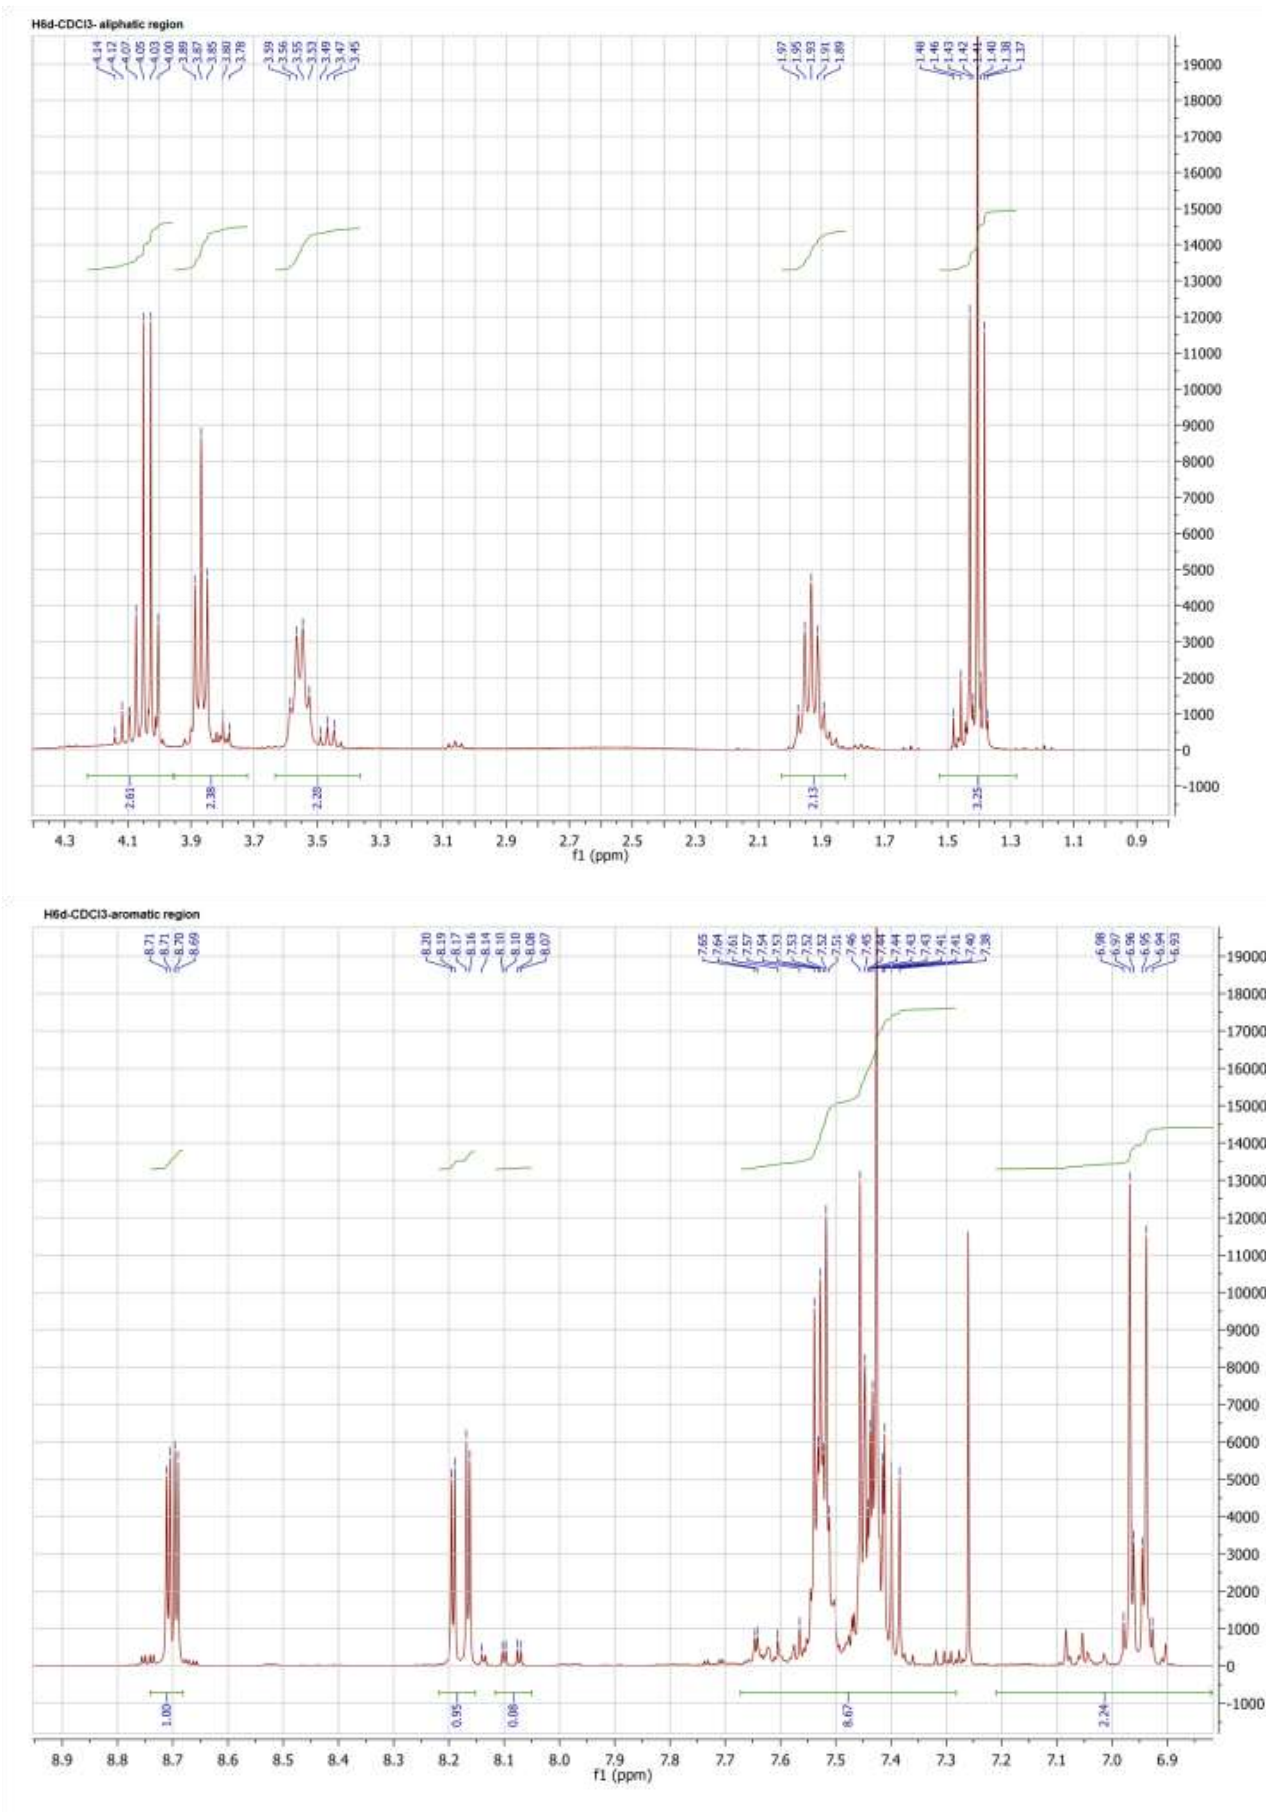



6d (75.47 MHz, CDCl3)

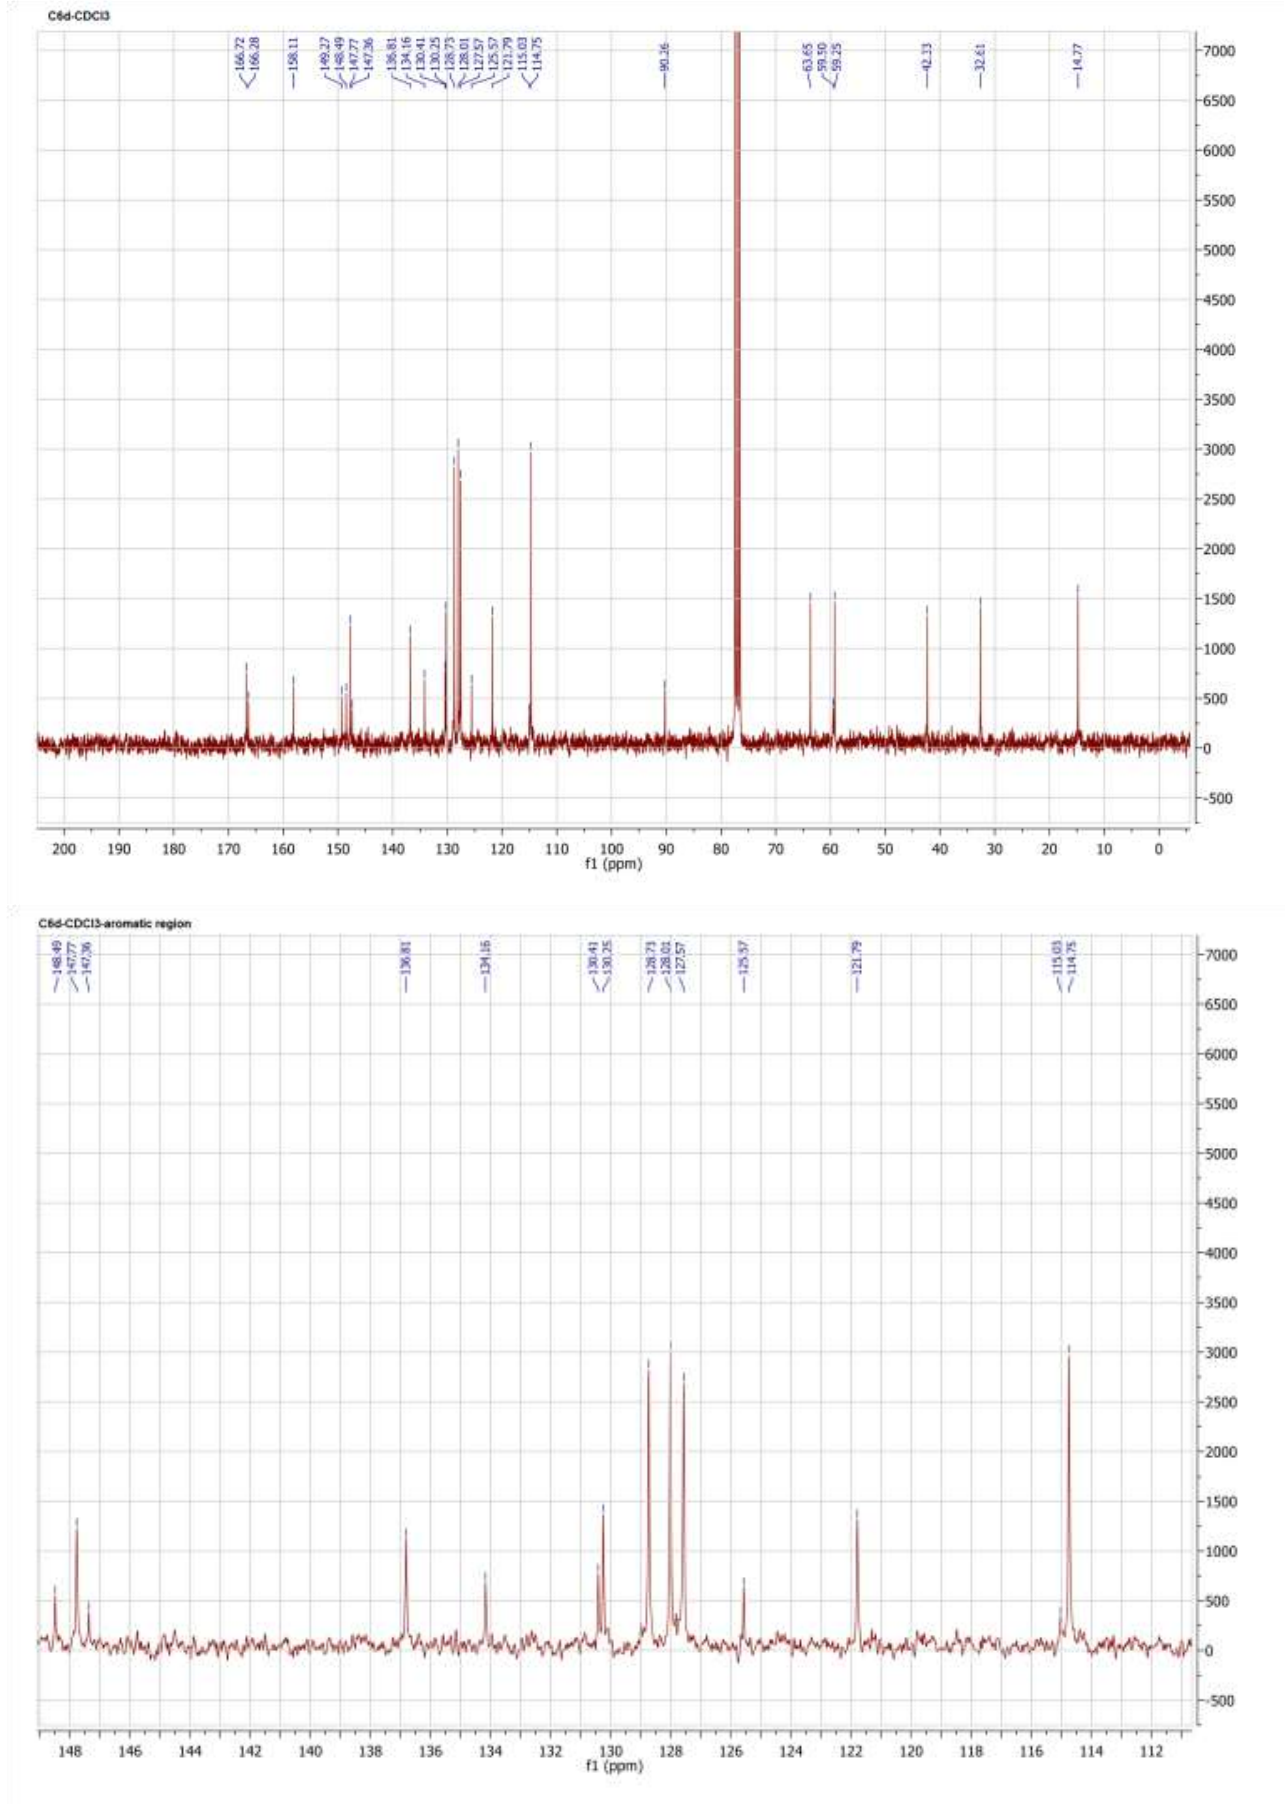



8a (75.47 MHz, )

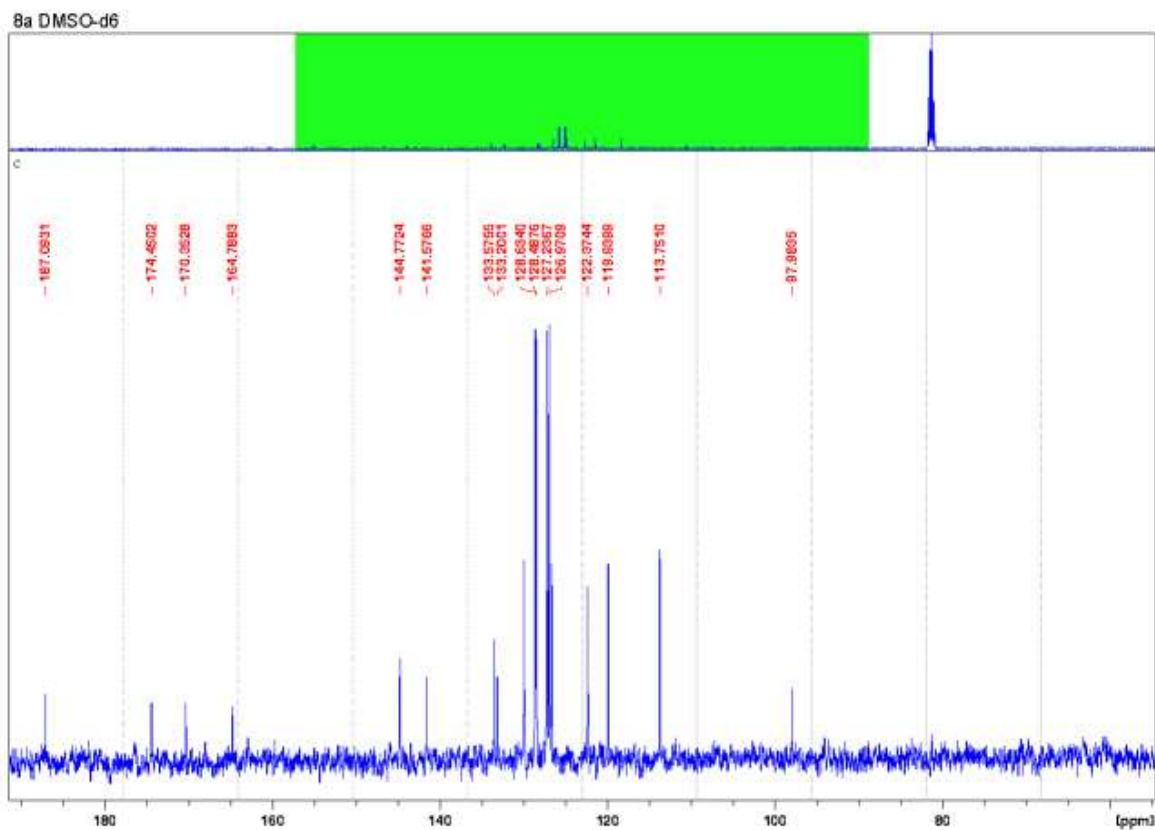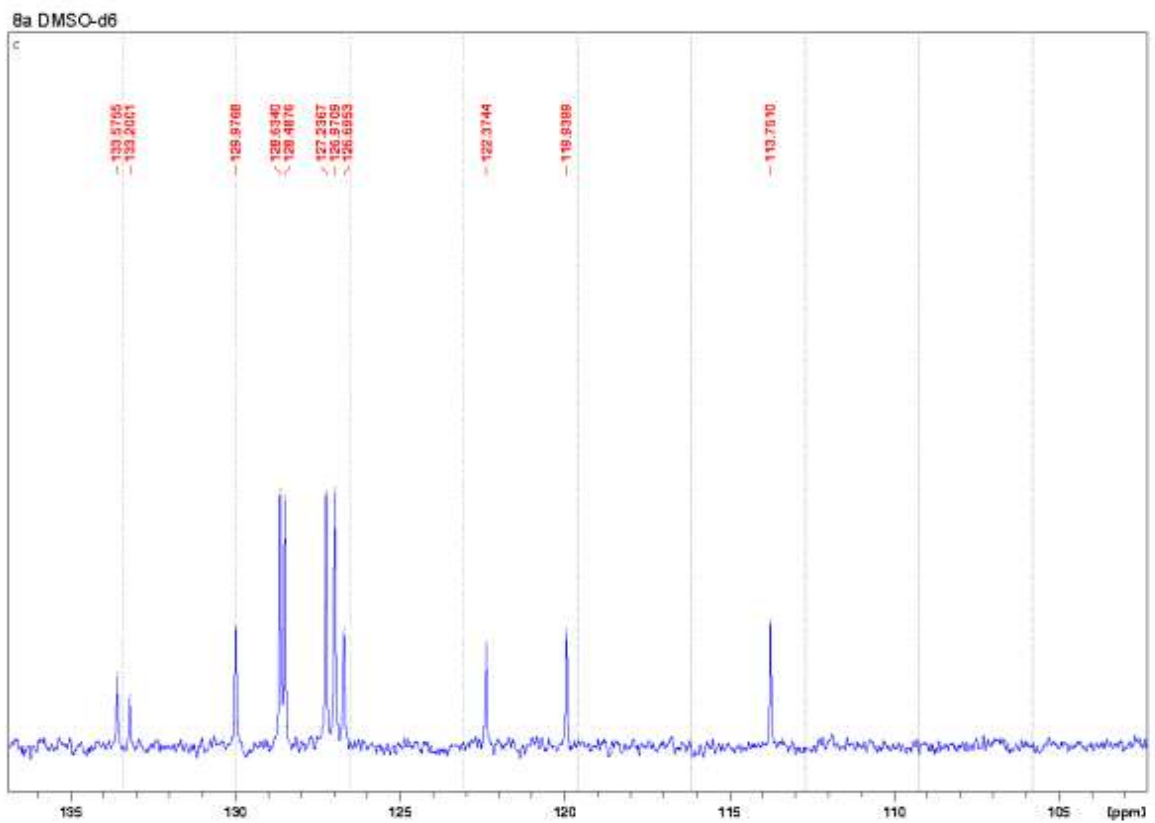



9a (75.47 MHz, )

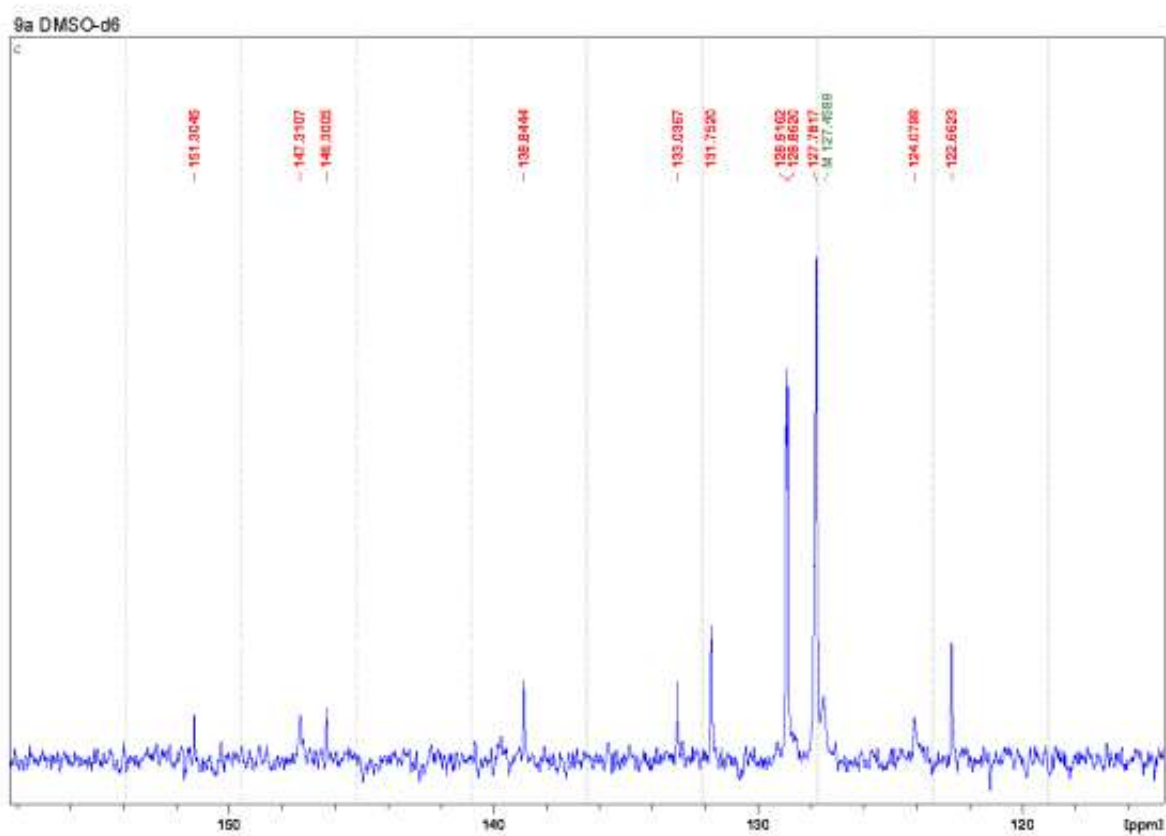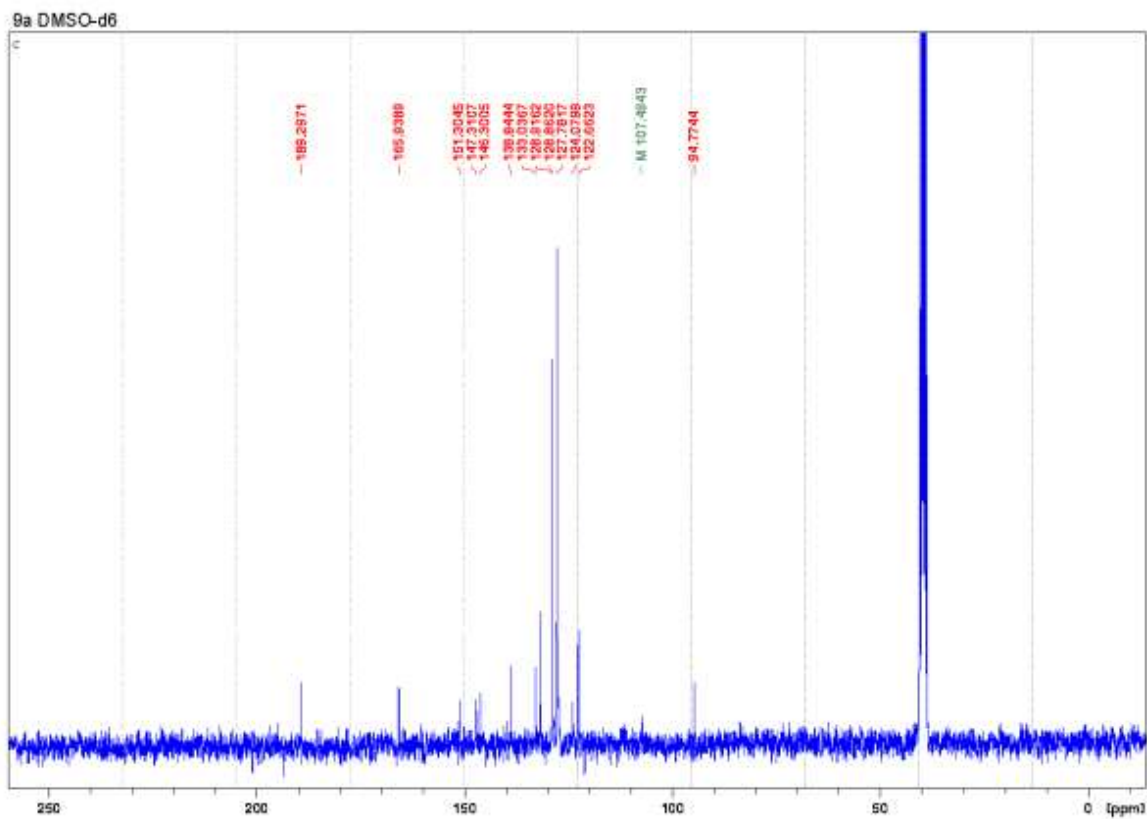





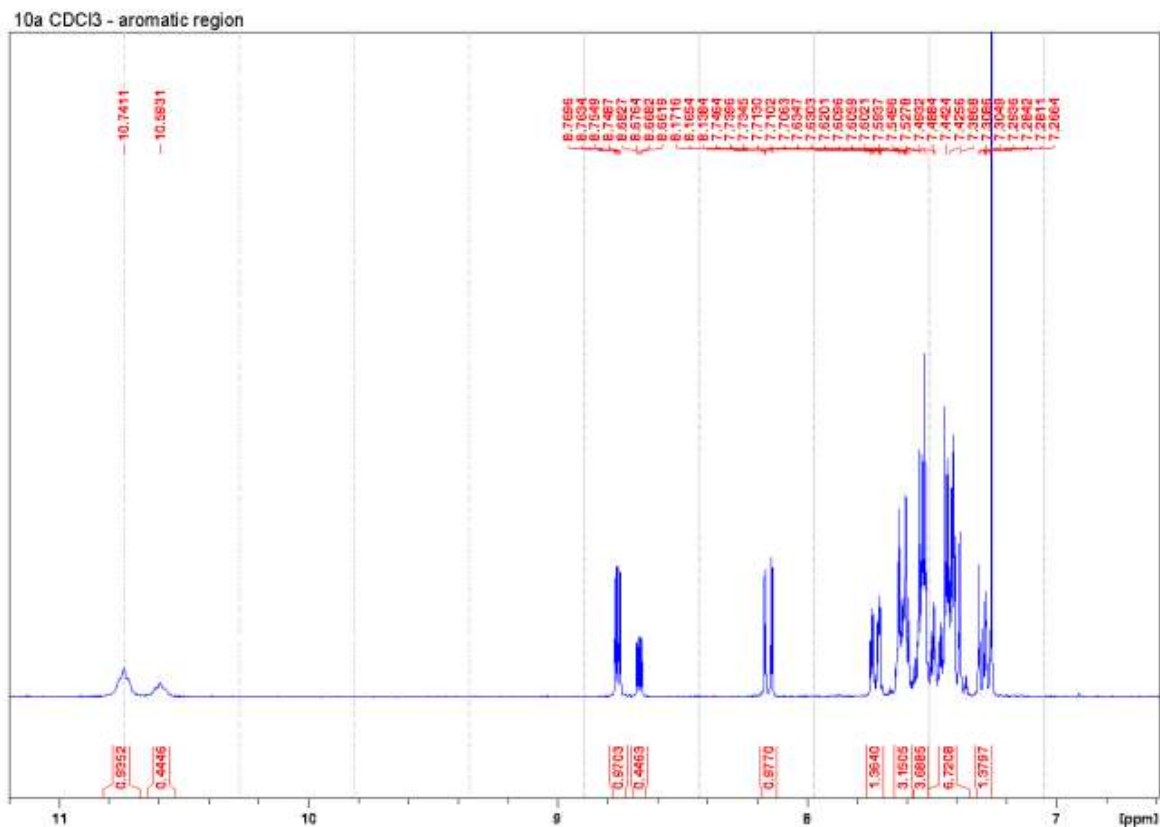

**12e** (300.13 MHz, CDCl<sub>3</sub>)

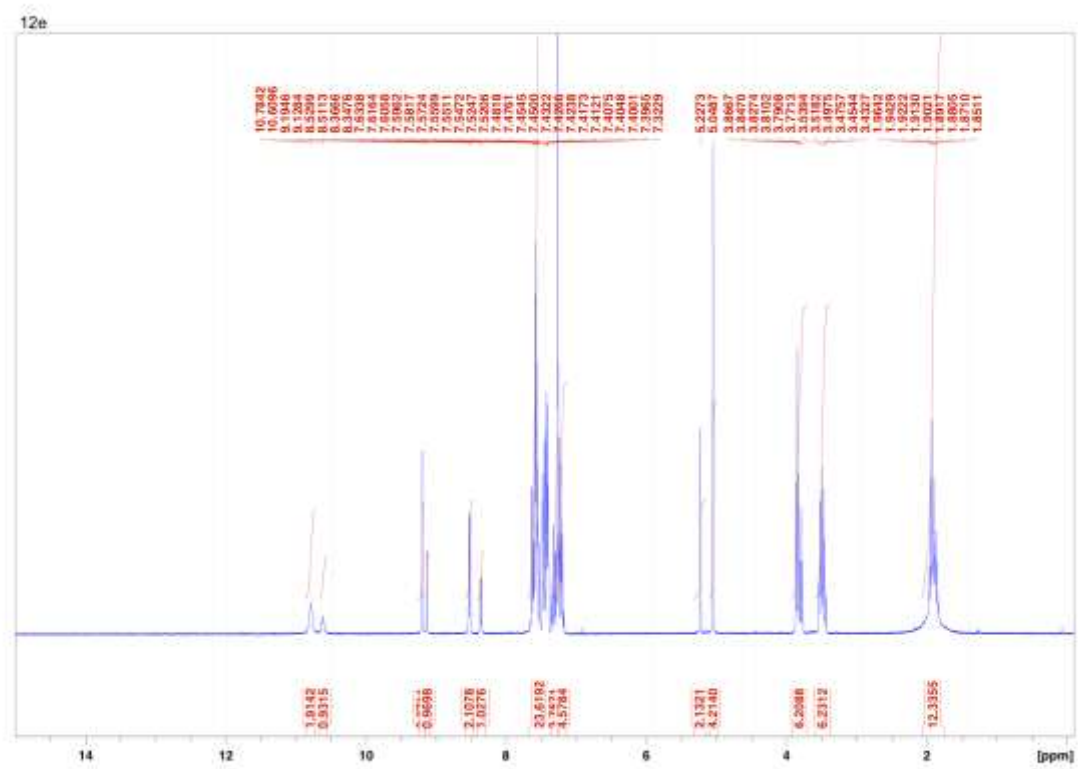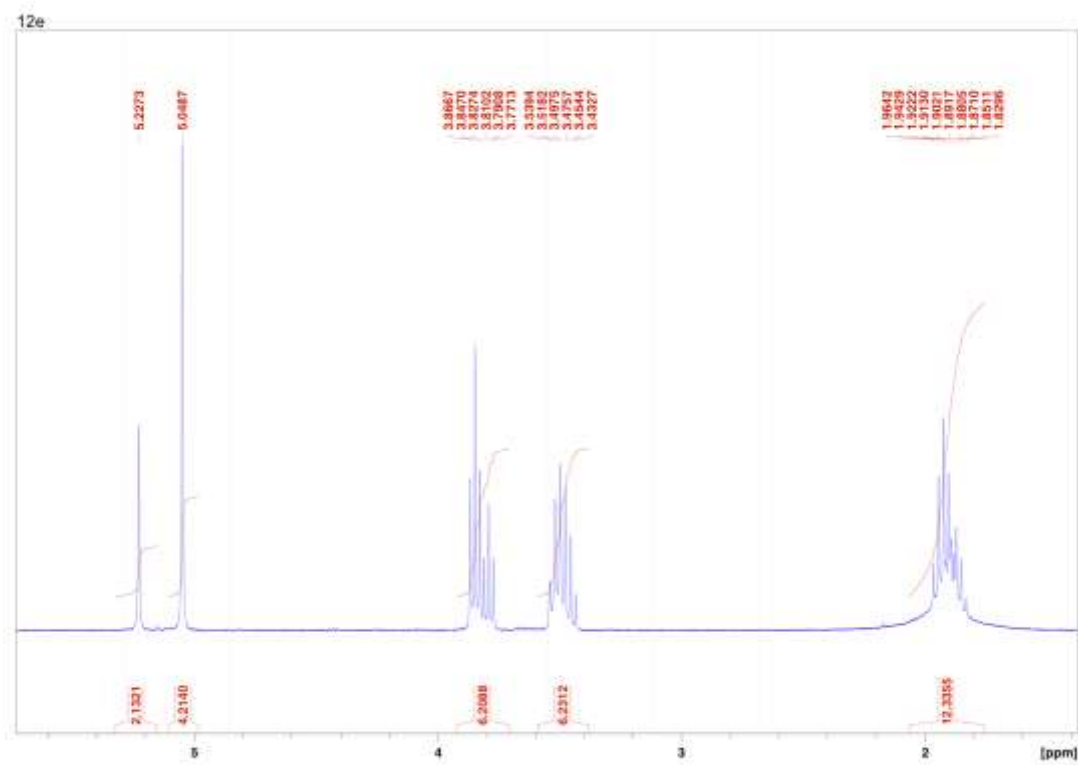

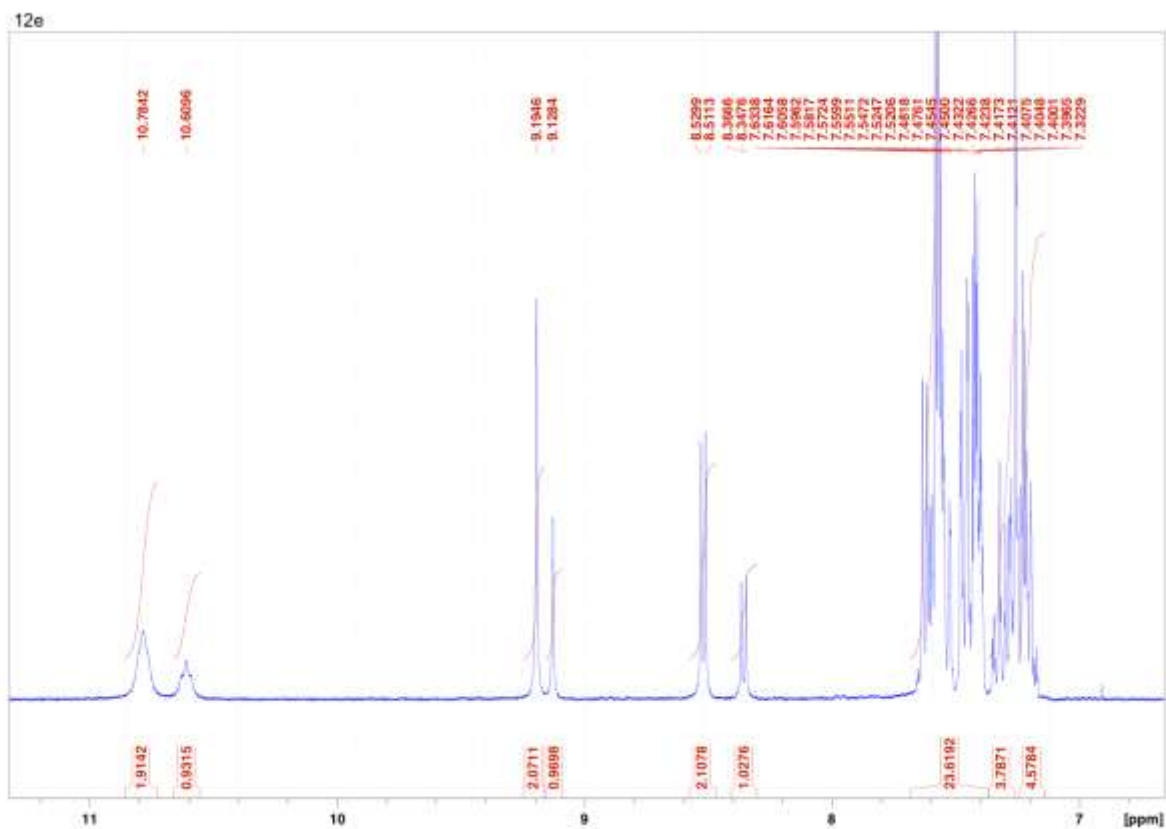

12e (75.47 MHz, CDCl<sub>3</sub>)

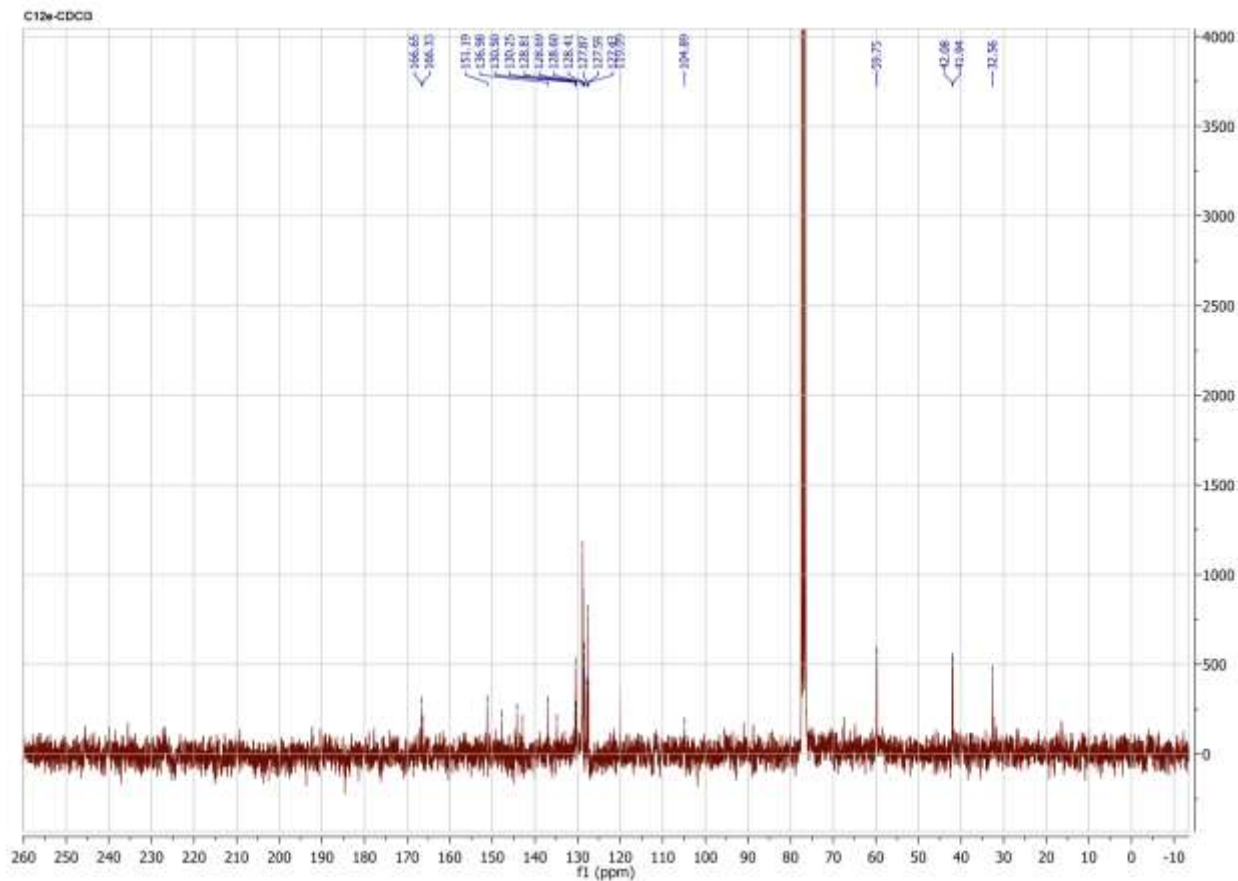

12f (300.13 MHz, CDCl3)

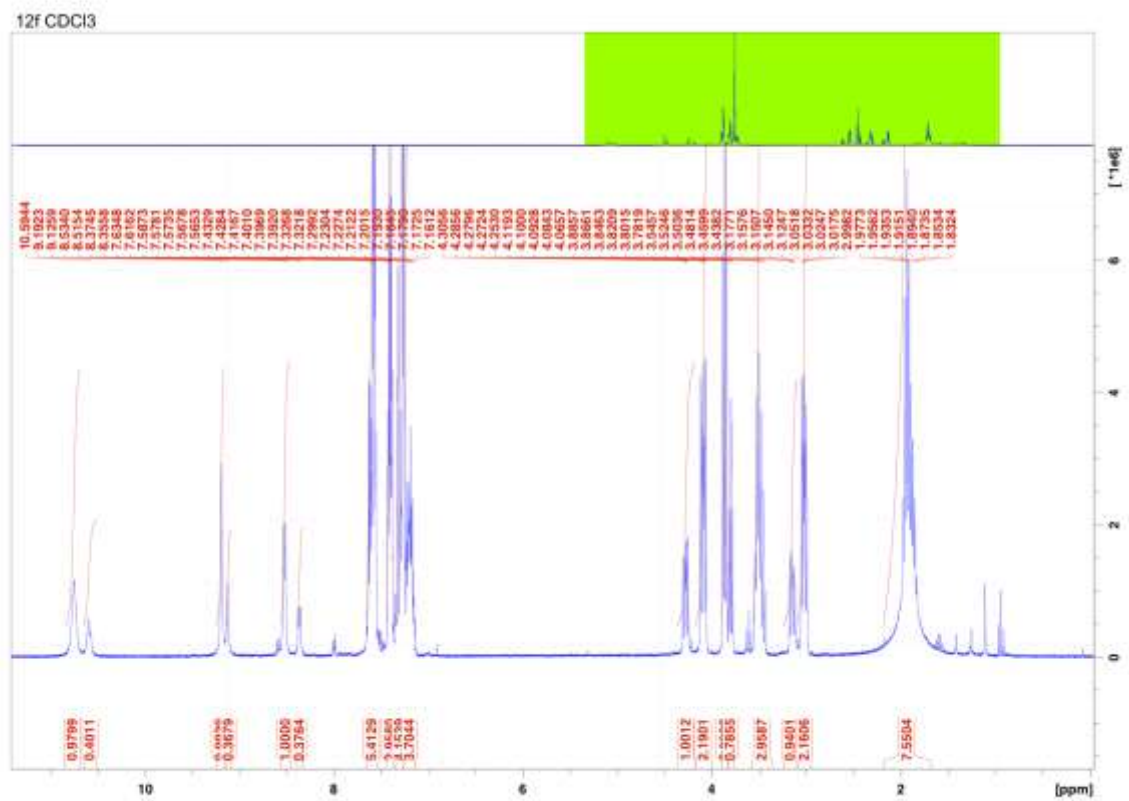

12f (75.47 MHz, CDCl3)

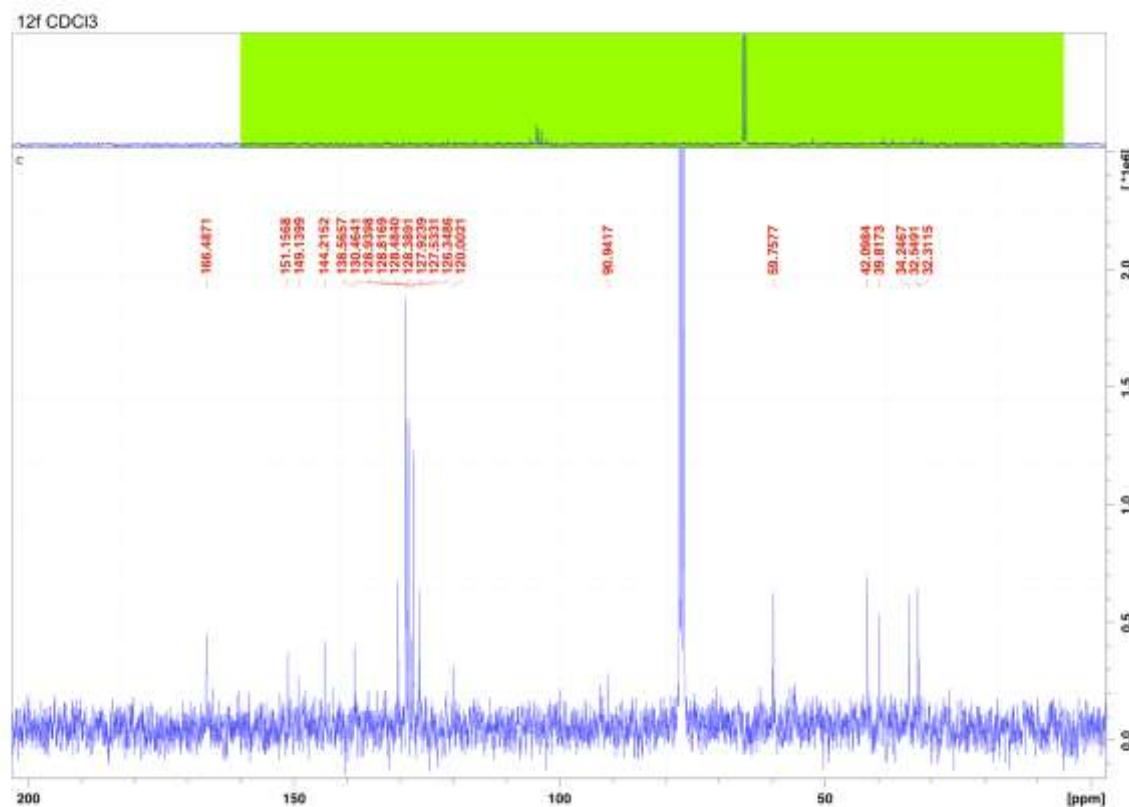

14e (300.13 MHz, )

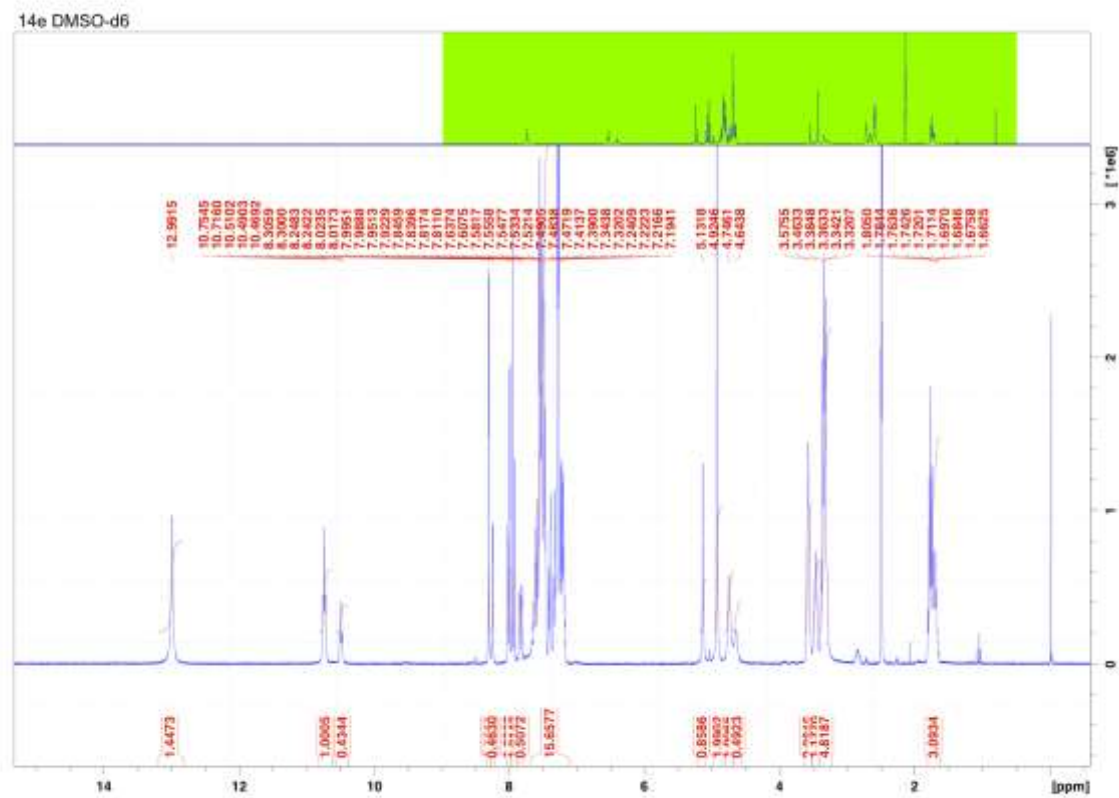

14e (75.47 MHz, )

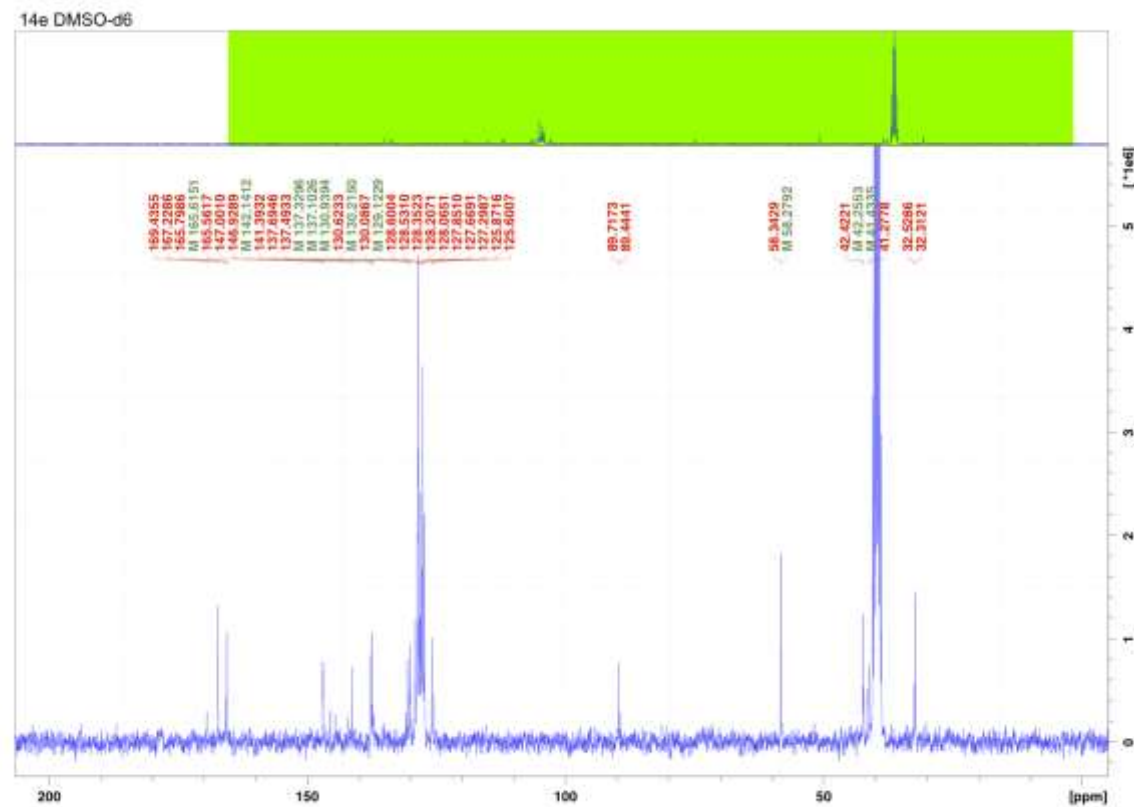

**14f** (300.13 MHz, )

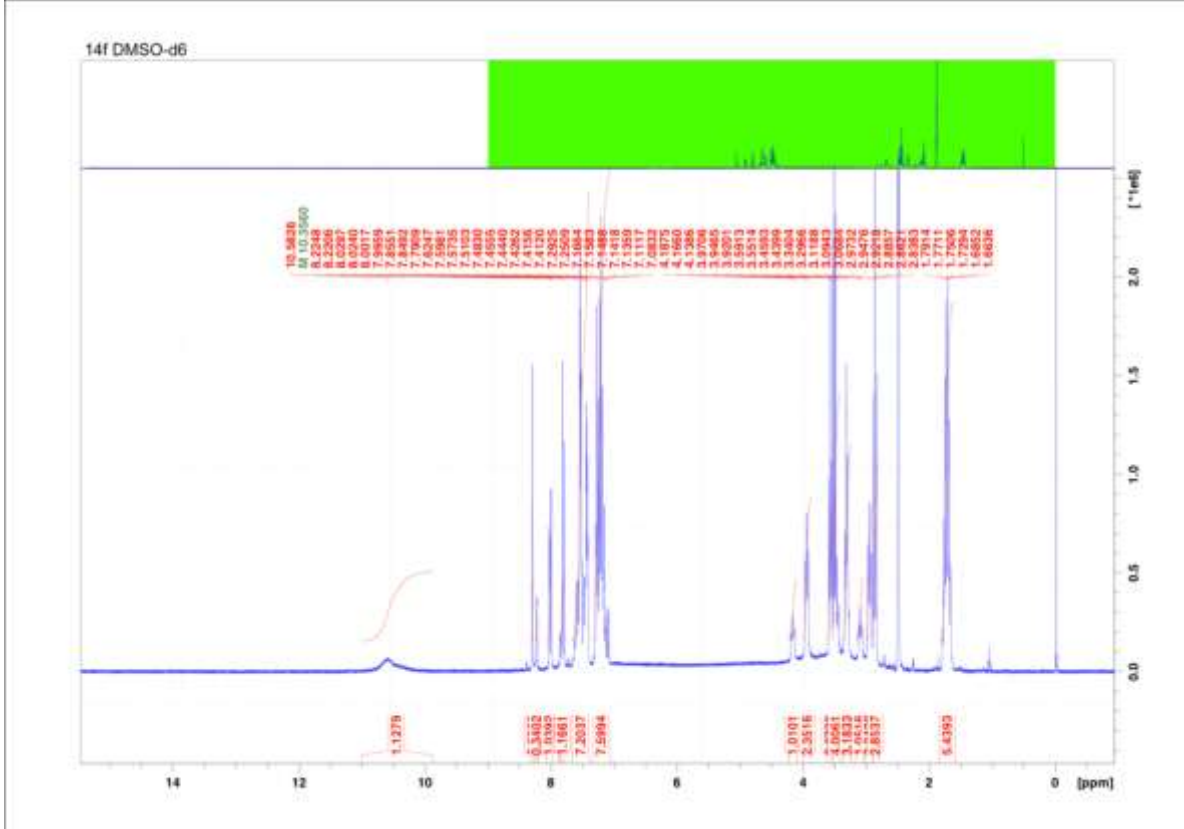

**14f** (75.47 MHz, )

**C-14f-DMSO-d6**

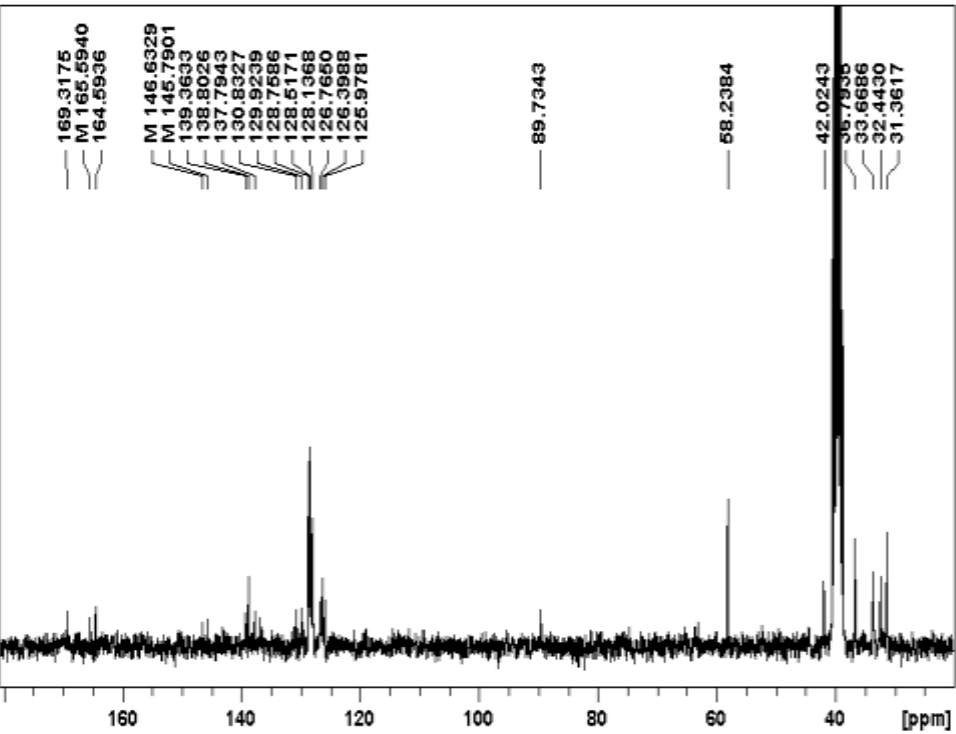



### Conformational and intermolecular interaction analysis for crystal structure of **6a** and **12e**

Compound **6a** crystallises in monohydrate form. In the structure of **12e**, disorder was observed for the hydroxyethyl group, with a site occupancy of 88.4% for the major component. However, the position of the hydroxyl group is defined without disorder due to its stabilisation by the strong intermolecular hydrogen bond O39-H39...N7 with its donor on the molecule related via the c-glide plane:  $x, -y+1.5, z-0.5$  (H39...N7 = 1.962(18) Å, O39...N7 = 2.852(1) Å and O39-H39...N7 = 174.7(15)°). A similar intermolecular hydrogen bond is also observed for **6a** with its acceptor on atom N5 of the molecule related via screw axis 21:  $-x+2, y-0.5, -z+0.5$  (H39...N5 = 1.87(2) Å, O39...N5 = 2.745(3) Å and O39-H39...N5 = 173 (5)°). The three aromatic systems in molecules of both compounds are in different mutual orientations, which influence the  $\pi$ - $\pi$  interactions observed in the three-dimensional crystal structure. The angle between phenylmetilidene aromatic fragment and the main three-membered heteroatomic ring system is 114.62(7)° and 99.66(3)° for **6a** and **12e**, respectively. Both molecules differ in the substituent attached to N1 atom. The phenyl substituent in case of compound **6a** forms angle 130.92(6)° with the main heteroatomic ring system, whereas in the structure **12e** the mutual orientation of the benzyl substituent to the main ring system is 102.99(3)°. Additional difference in position of nitrogen atom N5 or N7 of the main ring system for **6a** and **12e**, respectively, implicates various  $\pi$  electron properties, resulting in different way of interaction. Stacking is observed between the main ring system for crystal structure of **6a**. This  $\pi$ - $\pi$  interaction propagates parallel to [031] direction. The overlapping parts are the five-membered ring and six-membered ring of the molecule translated in [010] direction, which are arranged in the step-like construction. The distance between centroids ( $C_t...C_t$ ) of the overlapping rings is 3.558(3) Å, with shortest interatomic distance C3-C6\_2 3.440(2) Å (where \_2 is symmetry operator:  $x, y+1, z$ ). Due to symmetry observed in the crystal structure, molecules involved in stacking propagating parallel to [031] and [03-1] are arranged in a “herring-bone” fashion. Another  $\pi$ - $\pi$  interaction in the crystal structure of **6a** is observed between phenyl groups of two molecules related *via* inversion centre. The  $C_t...C_t$  distance of interacting rings is 3.770(3) Å and the shortest interatomic distance C13...C15\_3 is 3.368(2) Å (where \_3 is symmetry operator:  $-x+2, -y+1, -z+1$ ). In structure **12e** a dimer is formed by  $\pi$ - $\pi$  interaction of the main heteroatomic ring systems of molecules related by inversion centre. The overlapping of rings is however stronger, mainly observed between six-membered rings of the system with shortest  $C_t...C_t$  distance 3.542(2) Å. Both other aromatic rings in the molecule of **12e** do not form  $\pi$ - $\pi$  interactions.
